# Supplementary material
Source: PubMed Central journal article supplement (PMC2745168)
Supplement: NIHMS138113-supplement-01.pdf [file NIHMS138113-supplement-01.pdf]

Table Y: List of differentially expressed genes (genome wide) in hypthalamus of chow fed mice (B6.CAST-17 congenics vs B6 (WT))

| ProbeID | GeneName                                                      | Fold difference | UniGene             |
|---------|---------------------------------------------------------------|-----------------|---------------------|
| 848895  |                                                               | -7.04           |                     |
| 499305  | RIKEN cDNA 5530600A18 gene                                    | -4.85           | Mm.141054           |
| 578478  | cDNA sequence BC007180                                        | -4.42           |                     |
| 547772  | nitric oxide synthase 3 endothelial cell                      | -4.38           | Mm.258415           |
| 526851  | myozenin 3                                                    | -4.27           | Mm.252321           |
| 630135  | anillin actin binding protein (scraps homolog Drosophila)     | -4.04           | Mm.282751           |
| 355189  |                                                               | -3.67           |                     |
| 673010  | olfactory receptor 47                                         | -3.67           | Mm.222840           |
| 825725  | t-complex testis expressed 1                                  | -3.58           | Mm.1948             |
| 915758  | vacuolar protein sorting 24 (yeast)                           | -3.51           | Mm.181278           |
| 339472  | septin 4                                                      | -3.36           | Mm.2214             |
| 901876  |                                                               | -3.29           | Mm.361980           |
| 797869  | testis specific gene A2                                       | -3.24           | Mm.12743            |
| 889390  | nucleoporin 160                                               | -3.23           | Mm.24532            |
| 928140  | synuclein alpha                                               | -3.11           | Mm.17484            |
| 316090  |                                                               | -3.08           |                     |
| 770146  | tumor necrosis factor receptor superfamily member 1a          | -3.08           | Mm.1258             |
| 730931  |                                                               | -3.06           |                     |
| 462366  | sortilin-related VPS10 domain containing receptor 2           | -3.06           | Mm.34113            |
| 700437  |                                                               | -3.03           |                     |
| 675389  |                                                               | -3.00           |                     |
| 543097  |                                                               | -2.98           |                     |
| 530601  |                                                               | -2.95           |                     |
| 878686  | RIKEN cDNA B930011P16 gene                                    | -2.95           | Mm.371759           |
| 900650  | olfactory receptor 298                                        | -2.94           |                     |
| 305687  |                                                               | -2.90           |                     |
| 596781  |                                                               | -2.90           |                     |
| 870156  |                                                               | -2.88           |                     |
| 879977  |                                                               | -2.88           |                     |
| 667698  |                                                               | -2.87           |                     |
| 421828  | RIKEN cDNA 2900057D21 gene                                    | -2.85           | Mm.202322           |
| 743997  |                                                               | -2.85           | Mm.264651;Mm.326683 |
| 900419  |                                                               | -2.84           |                     |
| 560696  | similar to low density lipoprotein receptor-related protein 3 | -2.83           |                     |

|        |                                                           |       |           |
|--------|-----------------------------------------------------------|-------|-----------|
| 360536 | transcription elongation regulator 1-like                 | -2.83 | Mm.334297 |
| 806912 |                                                           | -2.82 |           |
| 561189 | splicing factor arginine/serine-rich 12                   | -2.82 | Mm.33908  |
| 649997 | Ngfi-A binding protein 1                                  | -2.82 | Mm.25903  |
| 731666 | ubiquitin specific protease 38                            | -2.81 | Mm.13437  |
| 607840 | lipopolysaccharide binding protein                        | -2.79 | Mm.218846 |
| 376741 |                                                           | -2.79 |           |
| 726304 | RIKEN cDNA 5033414D02 gene                                | -2.77 | Mm.275511 |
| 787569 |                                                           | -2.75 |           |
| 650020 | serologically defined colon cancer antigen 33 like        | -2.75 |           |
| 730122 | B lymphoma Mo-MLV insertion region 1                      | -2.74 | Mm.289584 |
| 640613 |                                                           | -2.72 |           |
| 504932 | N-deacetylase/N-sulfotransferase (heparan glucosaminy) 1  | -2.72 | Mm.181862 |
| 862842 |                                                           | -2.71 |           |
| 750696 | similar to ribosomal protein S18                          | -2.70 |           |
| 915442 | glyoxalase 1                                              | -2.70 | Mm.261984 |
| 919579 |                                                           | -2.70 |           |
| 925620 |                                                           | -2.68 |           |
| 844296 |                                                           | -2.67 |           |
| 893683 |                                                           | -2.67 |           |
| 487259 |                                                           | -2.65 |           |
| 333908 |                                                           | -2.65 |           |
| 908632 | myosin Vb                                                 | -2.64 | Mm.260098 |
| 914352 | RIKEN cDNA B430110G05 gene                                | -2.63 | Mm.301740 |
| 531711 |                                                           | -2.63 |           |
| 570528 | RIKEN cDNA 4932432K03 gene                                | -2.61 | Mm.370262 |
| 606395 |                                                           | -2.60 |           |
| 755157 |                                                           | -2.59 |           |
| 628682 | Bcl-2 binding component 3                                 | -2.58 | Mm.7660   |
| 907358 | expressed sequence AI225782                               | -2.57 | Mm.349603 |
| 747095 |                                                           | -2.57 |           |
| 629089 | NIMA (never in mitosis gene a)-related expressed kinase 8 | -2.57 | Mm.23788  |
| 837926 |                                                           | -2.55 |           |
| 377736 |                                                           | -2.55 |           |
| 585136 | KH-type splicing regulatory protein                       | -2.54 | Mm.34296  |
| 552134 |                                                           | -2.54 |           |
| 305864 |                                                           | -2.54 |           |
| 915102 | proteolipid protein 2                                     | -2.52 | Mm.18565  |
| 352907 |                                                           | -2.52 |           |

|        |                                                                        |       |           |
|--------|------------------------------------------------------------------------|-------|-----------|
| 576175 | RIKEN cDNA A830006F12 gene                                             | -2.52 | Mm.255460 |
| 448942 | cDNA sequence BC038286                                                 | -2.52 | Mm.273062 |
| 892311 |                                                                        | -2.52 |           |
| 749633 | F-box and leucine-rich repeat protein 15                               | -2.51 | Mm.19973  |
| 387221 | olfactory receptor 1504                                                | -2.50 |           |
| 571401 |                                                                        | -2.50 |           |
| 699232 | trophoblast glycoprotein                                               | -2.50 | Mm.20864  |
| 443738 |                                                                        | -2.49 |           |
| 433425 |                                                                        | -2.49 |           |
| 321598 | transgelin 2                                                           | -2.48 | Mm.271711 |
| 430779 |                                                                        | -2.48 |           |
| 663332 |                                                                        | -2.47 |           |
| 518663 | transmembrane protein 41B                                              | -2.47 | Mm.43212  |
| 639587 | guanine nucleotide binding protein (G protein) gamma 12                | -2.47 | Mm.234342 |
| 922224 | histidine decarboxylase                                                | -2.46 | Mm.18603  |
| 883169 | serine palmitoyltransferase long chain base subunit 2                  | -2.45 | Mm.565    |
| 786361 | undifferentiated embryonic cell transcription factor 1                 | -2.45 | Mm.10205  |
| 454527 | phosphodiesterase 3B cGMP-inhibited                                    | -2.45 | Mm.103319 |
| 402609 | cyclin H                                                               | -2.44 | Mm.18474  |
| 591232 | UDP-GalNAc:betaGlcNAc beta 1 3-galactosaminyltransferase polypeptide 2 | -2.44 | Mm.21686  |
| 547739 | procollagen type XI alpha 1                                            | -2.42 | Mm.209715 |
| 418284 | glucocorticoid modulatory element binding protein 1                    | -2.42 | Mm.103489 |
| 617994 |                                                                        | -2.41 |           |
| 841266 | RIKEN cDNA C730024G19 gene                                             | -2.41 |           |
| 891994 |                                                                        | -2.41 | Mm.315962 |
| 743006 | cytidine 5'-triphosphate synthase                                      | -2.38 | Mm.1815   |
| 666288 | cDNA sequence AK129302                                                 | -2.38 | Mm.336158 |
| 552069 | acid phosphatase-like 2                                                | -2.38 | Mm.233031 |
| 907352 | heat shock 27kDa protein 8                                             | -2.37 | Mm.21549  |
| 590162 | F-box and leucine-rich repeat protein 3                                | -2.36 | Mm.214746 |
| 833737 |                                                                        | -2.35 |           |
| 894286 |                                                                        | -2.35 |           |
| 681592 | hairy and enhancer of split 2 (Drosophila)                             | -2.35 | Mm.57038  |
| 445595 |                                                                        | -2.34 | Mm.246934 |
| 787142 |                                                                        | -2.33 |           |
| 408227 | neuroepithelial cell transforming gene                                 | -2.33 | Mm.22261  |

|        |                                                                   |       |           |
|--------|-------------------------------------------------------------------|-------|-----------|
|        | 1                                                                 |       |           |
| 343043 | integrin-linked kinase-associated serine/threonine phosphatase 2C | -2.33 | Mm.337240 |
| 910080 | tousled-like kinase 2 (Arabidopsis)                               | -2.32 | Mm.126976 |
| 572843 | homeo box B3                                                      | -2.32 | Mm.342481 |
| 415875 | RIKEN cDNA 1700128F08 gene                                        | -2.32 | Mm.159758 |
| 884286 | Bcl-associated death promoter                                     | -2.32 | Mm.4387   |
| 456018 | RIKEN cDNA 1700019G17 gene                                        | -2.32 | Mm.24454  |
| 309430 | cofactor required for Sp1 transcriptional activation subunit 3    | -2.29 |           |
| 403281 | RIKEN cDNA 4933409K03 gene                                        | -2.29 |           |
| 801698 |                                                                   | -2.28 |           |
| 461669 | programmed cell death protein 7                                   | -2.28 | Mm.29193  |
| 691068 |                                                                   | -2.28 | Mm.180873 |
| 643027 | chondroitin sulfate proteoglycan 5                                | -2.27 | Mm.38496  |
| 464798 | nucleosome binding protein 1                                      | -2.27 | Mm.298443 |
| 642048 | RIKEN cDNA 1700007K13 gene                                        | -2.26 |           |
| 449542 | spondin 1 (f-spondin) extracellular matrix protein                | -2.25 | Mm.334160 |
| 822417 | RIKEN cDNA 5630401D24 gene                                        | -2.24 | Mm.270569 |
| 917492 | lymphocyte antigen 96                                             | -2.24 | Mm.116844 |
| 507807 | RIKEN cDNA 5330414O08 gene                                        | -2.23 | Mm.228995 |
| 765189 | RIKEN cDNA 9430023P16 gene                                        | -2.23 | Mm.270775 |
| 548781 |                                                                   | -2.23 |           |
| 470378 | A kinase (PRKA) anchor protein 8                                  | -2.22 | Mm.328945 |
| 361374 |                                                                   | -2.22 |           |
| 435883 |                                                                   | -2.22 |           |
| 318312 | RIKEN cDNA 4921537D05 gene                                        | -2.22 | Mm.296971 |
| 447230 | general transcription factor IIIC polypeptide 4                   | -2.22 | Mm.26043  |
| 643728 |                                                                   | -2.21 |           |
| 407916 |                                                                   | -2.21 |           |
| 639061 | inhibitor of growth family member 1-like                          | -2.20 | Mm.272313 |
| 690253 | ligand of numb-protein X 1                                        | -2.20 | Mm.370189 |
| 423160 | FK506 binding protein 10                                          | -2.20 | Mm.3894   |
| 897805 |                                                                   | -2.19 |           |
| 872447 |                                                                   | -2.19 |           |
| 641229 | kangai 1 (suppression of tumorigenicity 6 prostate)               | -2.19 | Mm.4261   |
| 847731 |                                                                   | -2.19 |           |
| 566166 | RIKEN cDNA 4930487N19 gene                                        | -2.18 |           |
| 920918 | cytotoxic T lymphocyte-associated protein 2 alpha                 | -2.18 | Mm.358584 |
| 428202 | SMAD specific E3 ubiquitin protein                                | -2.18 | Mm.340955 |

|        |                                                                               |       |           |
|--------|-------------------------------------------------------------------------------|-------|-----------|
|        | ligase 2                                                                      |       |           |
| 387701 |                                                                               | -2.18 |           |
| 475763 |                                                                               | -2.18 |           |
| 733569 | cytochrome P450 family 27<br>subfamily a polypeptide 1                        | -2.18 | Mm.85083  |
| 701783 | tumor necrosis factor alpha-induced<br>protein 8                              | -2.17 | Mm.27740  |
| 462877 | RIKEN cDNA 1810043M15 gene                                                    | -2.17 | Mm.260975 |
| 410868 |                                                                               | -2.17 |           |
| 309086 |                                                                               | -2.17 |           |
| 900391 |                                                                               | -2.16 |           |
| 370630 |                                                                               | -2.16 |           |
| 847697 |                                                                               | -2.16 |           |
| 867102 | RIKEN cDNA 4921521J11 gene                                                    | -2.15 | Mm.252421 |
| 595996 |                                                                               | -2.13 | Mm.218533 |
| 362413 |                                                                               | -2.13 |           |
| 475446 |                                                                               | -2.13 |           |
| 308858 |                                                                               | -2.13 |           |
| 427906 | RIKEN cDNA 9630033F20 gene                                                    | -2.12 | Mm.101836 |
| 336308 |                                                                               | -2.12 |           |
| 364788 |                                                                               | -2.12 |           |
| 707674 | EF hand domain containing 2                                                   | -2.12 | Mm.17917  |
| 751293 | RIKEN cDNA 1700021P22 gene                                                    | -2.12 |           |
| 930166 | RIKEN cDNA D530033C11 gene                                                    | -2.11 | Mm.176347 |
| 749766 |                                                                               | -2.11 |           |
| 830737 |                                                                               | -2.11 |           |
| 538993 | paraneoplastic antigen MA1                                                    | -2.11 | Mm.272814 |
| 360013 |                                                                               | -2.11 |           |
| 783824 | NAD(P)H:quinone oxidoreductase<br>type 3 polypeptide A2                       | -2.11 | Mm.280230 |
| 350967 |                                                                               | -2.10 |           |
| 732704 | formin binding protein 3                                                      | -2.10 | Mm.257474 |
| 307847 | potassium voltage gated channel<br>Shaw-related subfamily member 1            | -2.10 | Mm.249386 |
| 320321 |                                                                               | -2.10 |           |
| 562819 |                                                                               | -2.09 |           |
| 652995 |                                                                               | -2.09 |           |
| 865203 | zinc finger protein 180                                                       | -2.09 | Mm.32254  |
| 861824 |                                                                               | -2.09 |           |
| 908128 |                                                                               | -2.09 |           |
| 712325 | PHD finger protein 20-like 1                                                  | -2.09 |           |
| 535868 | TAF7 RNA polymerase II TATA box<br>binding protein (TBP)-associated<br>factor | -2.08 | Mm.236009 |

|        |                                                                                                        |       |           |
|--------|--------------------------------------------------------------------------------------------------------|-------|-----------|
| 468003 | pyrroline-5-carboxylate reductase family member 2                                                      | -2.08 | Mm.274180 |
| 894320 |                                                                                                        | -2.07 |           |
| 898470 |                                                                                                        | -2.07 |           |
| 908720 |                                                                                                        | -2.07 |           |
| 353741 |                                                                                                        | -2.07 |           |
| 905468 | RIKEN cDNA 5730427C23 gene                                                                             | -2.07 | Mm.45104  |
| 438225 |                                                                                                        | -2.07 |           |
| 756978 |                                                                                                        | -2.07 |           |
| 730462 | cysteine-rich hydrophobic domain 2                                                                     | -2.06 | Mm.239814 |
| 760279 | RIKEN cDNA 3110001I20 gene                                                                             | -2.06 |           |
| 609505 | hypothetical protein 4933409I22                                                                        | -2.06 | Mm.248902 |
| 555087 |                                                                                                        | -2.06 |           |
| 515794 | zinc finger protein 36 C3H type-like 1 doublesex and mab-3 related transcription factor like family A2 | -2.06 | Mm.235132 |
| 319951 |                                                                                                        | -2.05 | Mm.32825  |
| 481425 |                                                                                                        | -2.05 |           |
| 584826 |                                                                                                        | -2.05 | Mm.294662 |
| 340849 | NOL1/NOP2/Sun domain family member 5                                                                   | -2.05 | Mm.281189 |
| 539389 | RIKEN cDNA 1700019P01 gene                                                                             | -2.05 | Mm.86807  |
| 352609 | lymphocyte antigen 6 complex locus G5B                                                                 | -2.04 | Mm.104680 |
| 448904 | protease serine 25                                                                                     | -2.04 | Mm.21880  |
| 375429 | laminin beta 3                                                                                         | -2.04 | Mm.287014 |
| 462974 |                                                                                                        | -2.04 |           |
| 848401 | RIKEN cDNA 2810459M11 gene                                                                             | -2.04 |           |
| 430449 |                                                                                                        | -2.03 |           |
| 516266 |                                                                                                        | -2.03 |           |
| 376054 | plexin B1                                                                                              | -2.03 | Mm.53862  |
| 861512 |                                                                                                        | -2.03 |           |
| 316378 | vacuolar protein sorting 4a (yeast)                                                                    | -2.03 | Mm.236004 |
| 818408 | RIKEN cDNA C230052I12 gene                                                                             | -2.03 | Mm.206921 |
| 922280 |                                                                                                        | -2.03 | Mm.234437 |
| 619090 |                                                                                                        | -2.03 |           |
| 308725 | SUMO/sentrin specific protease 8                                                                       | -2.03 | Mm.279070 |
| 616195 | PRP4 pre-mRNA processing factor 4 homolog B (yeast)                                                    | -2.02 | Mm.10027  |
| 390723 | double C2 beta                                                                                         | -2.02 | Mm.5137   |
| 501879 |                                                                                                        | -2.02 |           |
| 378193 |                                                                                                        | -2.02 |           |
| 770658 |                                                                                                        | -2.02 |           |
| 732869 | rhopilin Rho GTPase binding protein 1                                                                  | -2.02 | Mm.57052  |

|        |                                                                                                                          |       |           |
|--------|--------------------------------------------------------------------------------------------------------------------------|-------|-----------|
| 339017 | intestinal cell kinase                                                                                                   | -2.02 | Mm.288719 |
| 418685 | TAF12 RNA polymerase II TATA box binding protein (TBP)-associated factor                                                 | -2.02 | Mm.331926 |
| 436208 | RIKEN cDNA 4932417116 gene                                                                                               | -2.01 |           |
| 485549 | RIKEN cDNA 2810422B04 gene                                                                                               | -2.01 | Mm.30256  |
| 664222 | goosecoid                                                                                                                | -2.01 | Mm.129    |
| 381892 | RIKEN cDNA E130113K08 gene                                                                                               | -2.01 | Mm.101711 |
| 658053 |                                                                                                                          | -2.01 |           |
| 545658 | BAT2 domain containing 1                                                                                                 | -2.01 |           |
| 921316 | LIM and senescent cell antigen-like domains 1                                                                            | -2.01 | Mm.57734  |
| 503170 | HIV-1 tat interactive protein 2 homolog (human)                                                                          | -2.01 | Mm.20801  |
| 902474 | RuvB-like protein 1                                                                                                      | -2.00 | Mm.358675 |
| 902693 |                                                                                                                          | -2.00 |           |
| 826419 | CXXC finger 6                                                                                                            | -2.00 |           |
| 686931 | RIKEN cDNA 1700012B15 gene                                                                                               | -1.99 | Mm.309774 |
| 380370 | HCF-binding transcription factor Zhangfei                                                                                | -1.99 | Mm.29496  |
| 505561 |                                                                                                                          | -1.99 |           |
| 854640 |                                                                                                                          | -1.99 |           |
| 659271 | cDNA sequence AB041803                                                                                                   | -1.99 | Mm.371693 |
| 647392 | pumilio 2 (Drosophila)                                                                                                   | -1.98 | Mm.341243 |
| 662346 | RIKEN cDNA 2010106G01 gene                                                                                               | -1.98 | Mm.269928 |
| 498201 |                                                                                                                          | -1.98 |           |
| 390266 | RIKEN cDNA 2510002D24 gene                                                                                               | -1.98 |           |
| 399900 |                                                                                                                          | -1.98 |           |
| 424711 | solute carrier family 16 (monocarboxylic acid transporters) member 6                                                     | -1.98 | Mm.265874 |
| 722633 | pericentrin 1                                                                                                            | -1.98 | Mm.4379   |
| 585926 |                                                                                                                          | -1.97 |           |
| 755154 |                                                                                                                          | -1.97 |           |
| 844889 | O-linked N-acetylglucosamine (GlcNAc) transferase (UDP-N-acetylglucosamine:polypeptide-N-acetylglucosaminyl transferase) | -1.97 | Mm.259191 |
| 681631 | exportin 5                                                                                                               | -1.97 | Mm.275039 |
| 334859 | myeloid/lymphoid or mixed-lineage leukemia                                                                               | -1.97 |           |
| 508579 | RIKEN cDNA 1110001M19 gene                                                                                               | -1.96 |           |
| 851162 | jagged 2                                                                                                                 | -1.96 | Mm.186146 |
| 533164 | NK2 transcription factor related locus 5 (Drosophila)                                                                    | -1.96 | Mm.41974  |
| 588567 |                                                                                                                          | -1.96 |           |

|        |                                                                    |       |           |
|--------|--------------------------------------------------------------------|-------|-----------|
| 510538 |                                                                    | -1.96 |           |
| 908496 | neuropeptide Y                                                     | -1.96 | Mm.154796 |
| 397954 | RIKEN cDNA 3830406C13 gene                                         | -1.95 | Mm.44068  |
| 451990 |                                                                    | -1.95 | Mm.288730 |
| 312816 |                                                                    | -1.95 | Mm.275728 |
| 481086 | nucleotide binding protein 1                                       | -1.95 | Mm.29037  |
| 529171 | N-ethylmaleimide sensitive fusion protein attachment protein gamma | -1.95 |           |
| 565921 | PHD finger protein 8                                               | -1.95 | Mm.17156  |
| 408325 |                                                                    | -1.95 |           |
| 309111 | Kruppel-like factor 16                                             | -1.95 | Mm.41513  |
| 721089 | scaffold attachment factor B                                       | -1.95 |           |
| 610708 | protein phosphatase 4 regulatory subunit 2                         | -1.95 | Mm.336119 |
| 896494 |                                                                    | -1.95 | Mm.371551 |
| 312593 |                                                                    | -1.94 |           |
| 917291 | histocompatibility 2 D region locus 1                              | -1.94 | Mm.358603 |
| 780008 |                                                                    | -1.94 |           |
| 905072 | eukaryotic translation initiation factor 2 alpha kinase 4          | -1.94 | Mm.217616 |
| 537933 |                                                                    | -1.94 |           |
| 894339 |                                                                    | -1.94 |           |
| 369820 |                                                                    | -1.93 |           |
| 353516 | RIKEN cDNA B230354K17 gene                                         | -1.93 | Mm.206588 |
| 404796 |                                                                    | -1.93 |           |
| 913940 | cold shock domain protein A                                        | -1.93 | Mm.299604 |
| 346494 |                                                                    | -1.93 |           |
| 892440 |                                                                    | -1.93 |           |
| 795622 |                                                                    | -1.92 |           |
| 721938 |                                                                    | -1.92 |           |
| 714461 | sestrin 3                                                          | -1.92 | Mm.325126 |
| 431622 | potassium voltage gated channel Shaw-related subfamily member 4    | -1.92 | Mm.101976 |
| 916013 | lymphocyte specific 1                                              | -1.92 | Mm.234003 |
| 492594 |                                                                    | -1.92 |           |
| 659019 |                                                                    | -1.92 |           |
| 756127 | empty spiracles homolog 1 (Drosophila)                             | -1.92 |           |
| 848264 | expressed sequence AI661311                                        | -1.91 |           |
| 439756 |                                                                    | -1.91 | Mm.331628 |
| 671688 | open reading frame 21                                              | -1.91 | Mm.10628  |
| 451244 | peptidylprolyl isomerase (cyclophilin)-like 4                      | -1.91 | Mm.38927  |
| 546340 | ras homolog gene family member Q                                   | -1.91 | Mm.826    |



|        |                                                                                 |       |                    |
|--------|---------------------------------------------------------------------------------|-------|--------------------|
| 636062 | pantothenate kinase 3                                                           | -1.91 | Mm.255044          |
| 659293 | polymerase (DNA directed) mu                                                    | -1.91 | Mm.260194          |
| 527622 | RIKEN cDNA 2310057J16 gene                                                      | -1.91 |                    |
| 918912 | carbohydrate sulfotransferase 10                                                | -1.91 | Mm.260054          |
| 305197 | RIKEN cDNA 5730470L24 gene                                                      | -1.90 | Mm.208619          |
| 900970 |                                                                                 | -1.90 | Mm.328846          |
| 709252 |                                                                                 | -1.90 |                    |
| 353742 |                                                                                 | -1.90 | Mm.38195;Mm.183650 |
| 606307 | autophagy 12-like ( <i>S. cerevisiae</i> )                                      | -1.90 | Mm.9852            |
| 900210 |                                                                                 | -1.90 |                    |
| 703252 | gene model 918 (NCBI)                                                           | -1.90 |                    |
| 545120 | RIKEN cDNA 2010109K11 gene                                                      | -1.90 | Mm.341352          |
| 669220 | zinc finger FYVE domain containing 20                                           | -1.89 | Mm.290734          |
| 922700 |                                                                                 | -1.89 |                    |
| 300409 | nuclear factor erythroid derived 2 -like 1                                      | -1.89 | Mm.6743            |
| 722231 | regulatory solute carrier protein family 1 member 1                             | -1.89 | Mm.328621          |
| 867280 | SET and MYND domain containing 5                                                | -1.89 | Mm.219946          |
| 667590 | ankyrin repeat domain 10                                                        | -1.89 | Mm.12459           |
| 350024 | G protein-coupled receptor 135                                                  | -1.89 | Mm.373621          |
| 482174 | actinin alpha 4                                                                 | -1.89 | Mm.276042          |
| 554614 | RIKEN cDNA 4833447P13 gene                                                      | -1.89 |                    |
| 582022 | trans-acting transcription factor 4                                             | -1.89 | Mm.259312          |
| 439737 |                                                                                 | -1.89 |                    |
| 430041 |                                                                                 | -1.89 |                    |
| 329882 | solute carrier family 13 (sodium-dependent dicarboxylate transporter) member 3  | -1.89 | Mm.250738          |
| 858718 | tudor domain containing 3                                                       | -1.88 | Mm.35168           |
| 334157 | melanoma associated antigen (mutated) 1                                         | -1.88 | Mm.273418          |
| 475845 | cysteinyl leukotriene receptor 1                                                | -1.88 | Mm.287166          |
| 781928 |                                                                                 | -1.88 |                    |
| 819149 | Cbp/p300-interacting transactivator with Glu/Asp-rich carboxy-terminal domain 2 | -1.88 | Mm.272321          |
| 533269 | solute carrier family 30 (zinc transporter) member 6                            | -1.87 | Mm.243943          |
| 896390 |                                                                                 | -1.87 |                    |
| 506066 | sema domain transmembrane domain (TM) and cytoplasmic domain (semaphorin) 6A    | -1.87 | Mm.40909           |
| 626298 | sperm associated antigen 1                                                      | -1.87 | Mm.295539          |

|        |                                                                                  |       |                     |
|--------|----------------------------------------------------------------------------------|-------|---------------------|
| 656054 |                                                                                  | -1.87 |                     |
| 477411 |                                                                                  | -1.87 |                     |
| 739893 | phosphorylase kinase alpha 2                                                     | -1.87 | Mm.350712           |
| 800770 |                                                                                  | -1.86 |                     |
| 541510 |                                                                                  | -1.86 |                     |
| 447254 |                                                                                  | -1.86 |                     |
| 333751 | ISL1 transcription factor LIM/homeodomain (islet 1)                              | -1.85 | Mm.42242            |
| 613688 | epidermodysplasia verruciformis 2                                                | -1.85 | Mm.116675           |
| 878037 |                                                                                  | -1.85 |                     |
| 854132 | synaptoporin                                                                     | -1.85 | Mm.317515           |
| 923449 |                                                                                  | -1.85 | Mm.276338;Mm.300225 |
| 443708 |                                                                                  | -1.85 |                     |
| 782590 | RIKEN cDNA 2810427I04 gene                                                       | -1.85 | Mm.27925            |
| 900227 |                                                                                  | -1.84 |                     |
| 741104 | cytoplasmic polyadenylation element binding protein 1                            | -1.84 | Mm.273122           |
| 450173 |                                                                                  | -1.84 |                     |
| 879263 |                                                                                  | -1.84 |                     |
| 774374 |                                                                                  | -1.84 |                     |
| 850217 | chemokine-like factor super family 4 chromodomain helicase DNA binding protein 7 | -1.84 | Mm.29658            |
| 816794 |                                                                                  | -1.84 |                     |
| 695915 | RIKEN cDNA 2810013M15 gene                                                       | -1.84 | Mm.45748            |
| 327248 |                                                                                  | -1.84 |                     |
| 677573 |                                                                                  | -1.84 |                     |
| 838836 |                                                                                  | -1.84 |                     |
| 895717 |                                                                                  | -1.83 |                     |
| 687571 | pleckstrin homology domain containing family A member 5                          | -1.83 | Mm.247670           |
| 493729 | RIKEN cDNA 9930021J03 gene                                                       | -1.83 | Mm.329801           |
| 864480 |                                                                                  | -1.83 |                     |
| 851991 |                                                                                  | -1.83 |                     |
| 365566 | guanine monphosphate synthetase phosphoenolpyruvate carboxykinase 1 cytosolic    | -1.83 |                     |
| 924614 |                                                                                  | -1.83 | Mm.266867           |
| 406304 | RIKEN cDNA 0610011N22 gene                                                       | -1.83 | Mm.101586           |
| 490133 |                                                                                  | -1.83 |                     |
| 332584 |                                                                                  | -1.82 |                     |
| 671603 |                                                                                  | -1.82 |                     |
| 478646 | G protein-coupled receptor 64                                                    | -1.82 | Mm.213016           |
| 670901 | cDNA sequence AF155546                                                           | -1.82 | Mm.139166           |
| 302796 | pol polyprotein                                                                  | -1.82 |                     |

|        |                                                                                          |       |                     |
|--------|------------------------------------------------------------------------------------------|-------|---------------------|
| 592258 |                                                                                          | -1.82 | Mm.348219;Mm.220853 |
| 698359 |                                                                                          | -1.82 |                     |
| 507527 |                                                                                          | -1.82 |                     |
| 485658 |                                                                                          | -1.82 |                     |
| 901323 |                                                                                          | -1.82 |                     |
| 648047 |                                                                                          | -1.82 | Mm.354649           |
| 446731 |                                                                                          | -1.82 |                     |
| 756098 | nuclear receptor coactivator 6                                                           | -1.82 | Mm.27592            |
| 632465 | DNA segment Chr 10 Wayne State University 93 expressed                                   | -1.82 | Mm.27443            |
| 468294 | represso TP53 dependent G2 arrest mediator candidate                                     | -1.82 | Mm.27086            |
| 559476 |                                                                                          | -1.82 |                     |
| 458300 | RIKEN cDNA 3110032G18 gene                                                               | -1.82 | Mm.296138           |
| 773570 | cDNA sequence BC013529                                                                   | -1.81 | Mm.33716            |
| 902190 |                                                                                          | -1.81 |                     |
| 810159 |                                                                                          | -1.81 |                     |
| 917034 |                                                                                          | -1.81 |                     |
| 740356 | RIKEN cDNA B930041F14 gene                                                               | -1.81 | Mm.29083            |
| 811655 | torsin family 1 member B                                                                 | -1.81 | Mm.249164           |
| 587121 | growth arrest specific 1                                                                 | -1.81 | Mm.22701            |
| 515555 |                                                                                          | -1.81 |                     |
| 600412 | RIKEN cDNA E130203B14 gene                                                               | -1.81 | Mm.187910           |
| 753625 | cadherin 10                                                                              | -1.81 |                     |
| 829772 | RIKEN cDNA 1700011J10 gene                                                               | -1.81 | Mm.296825           |
| 629502 |                                                                                          | -1.81 |                     |
| 352205 | SPARC related modular calcium binding 1                                                  | -1.81 | Mm.273295           |
| 684161 |                                                                                          | -1.81 |                     |
| 406056 | ubiquitin-activating enzyme E1C protein phosphatase 2 regulatory subunit B delta isoform | -1.81 | Mm.277626           |
| 885676 | expressed sequence AW107703                                                              | -1.81 | Mm.258739           |
| 909262 | methylcrotonoyl-Coenzyme A carboxylase 1 (alpha)                                         | -1.81 |                     |
| 794619 |                                                                                          | -1.80 | Mm.249016           |
| 340346 |                                                                                          | -1.80 |                     |
| 389103 |                                                                                          | -1.80 | Mm.88790;Mm.196598  |
| 456721 |                                                                                          | -1.80 |                     |
| 739489 | phosphodiesterase 5A cGMP-specific                                                       | -1.80 | Mm.214137           |
| 861961 | RIKEN cDNA 4732486I23 gene                                                               | -1.80 |                     |
| 411121 | cathepsin F                                                                              | -1.80 | Mm.29561            |
| 766206 | DNA segment Chr 9 ERATO Doi 280 expressed                                                | -1.80 | Mm.258310           |

|        |                                                                                               |       |           |
|--------|-----------------------------------------------------------------------------------------------|-------|-----------|
| 632193 | SEC63-like ( <i>S. cerevisiae</i> )                                                           | -1.80 | Mm.214344 |
| 796510 | plasma glutamate carboxypeptidase                                                             | -1.80 | Mm.158251 |
| 575393 | ProSAPIP1 protein                                                                             | -1.80 | Mm.330594 |
| 635073 | tropomodulin 1                                                                                | -1.79 | Mm.249594 |
| 926125 | ELAV (embryonic lethal abnormal vision <i>Drosophila</i> )-like 4 (Hu antigen D)              | -1.79 | Mm.3970   |
| 402924 | cDNA sequence BC035295                                                                        | -1.79 | Mm.294969 |
| 705194 |                                                                                               | -1.79 |           |
| 913333 | RIKEN cDNA A230106M15 gene                                                                    | -1.79 | Mm.12654  |
| 859802 | G protein-coupled receptor 89                                                                 | -1.79 | Mm.46722  |
| 410126 | RIKEN cDNA 1700009P17 gene                                                                    | -1.79 | Mm.32760  |
| 614425 | cerebellin 1 precursor protein                                                                | -1.79 | Mm.4880   |
| 566878 | carbohydrate (chondroitin) synthase 1                                                         | -1.79 |           |
| 322844 | period homolog 3 ( <i>Drosophila</i> )                                                        | -1.79 | Mm.121361 |
| 676310 | RIKEN cDNA 6330505F04 gene                                                                    | -1.79 | Mm.72753  |
| 839916 |                                                                                               | -1.79 |           |
| 562451 | hypoxia inducible factor 1 alpha subunit                                                      | -1.79 | Mm.234710 |
| 836179 |                                                                                               | -1.79 |           |
| 298316 |                                                                                               | -1.79 |           |
| 494056 | heat shock protein 1 (chaperonin 10)                                                          | -1.79 | Mm.215667 |
| 668849 |                                                                                               | -1.79 |           |
| 893850 |                                                                                               | -1.78 |           |
| 917445 | pyruvate dehydrogenase kinase isoenzyme 2                                                     | -1.78 | Mm.29768  |
| 916039 | expressed sequence AI429152                                                                   | -1.78 | Mm.288005 |
| 554150 | solute carrier family 30 (zinc transporter) member 4                                          | -1.78 | Mm.27801  |
| 390542 | tumor protein D52                                                                             | -1.78 | Mm.371590 |
| 477726 | lectin mannose-binding 1                                                                      | -1.78 | Mm.290857 |
| 701255 |                                                                                               | -1.78 |           |
| 418641 | cask-interacting protein 2                                                                    | -1.78 | Mm.215122 |
| 373292 | ataxia telangiectasia mutated homolog (human)                                                 | -1.78 | Mm.5088   |
| 828461 | RIKEN cDNA 0610042I15 gene                                                                    | -1.78 | Mm.294821 |
| 825717 | nucleolar protein 5                                                                           | -1.77 | Mm.220367 |
| 856039 |                                                                                               | -1.77 |           |
| 727332 | mitochondrial ribosomal protein L17                                                           | -1.77 | Mm.44225  |
| 603206 | SWI/SNF related matrix associated actin dependent regulator of chromatin subfamily a member 4 | -1.77 | Mm.286593 |
| 395798 | TAR DNA binding protein                                                                       | -1.77 | Mm.24083  |
| 553888 | DNA segment Chr 5 ERATO Doi 606 expressed                                                     | -1.77 | Mm.236587 |

|        |                                                                      |       |           |
|--------|----------------------------------------------------------------------|-------|-----------|
| 783504 |                                                                      | -1.77 |           |
| 635291 |                                                                      | -1.77 |           |
| 755543 | queuine tRNA-ribosyltransferase 1                                    | -1.76 | Mm.24178  |
| 771905 |                                                                      | -1.76 |           |
| 368815 | RIKEN cDNA 4631424J17 gene                                           | -1.76 |           |
| 364405 | F-box only protein 5                                                 | -1.76 | Mm.197520 |
| 395134 |                                                                      | -1.76 |           |
| 799118 | dystrophin related protein 2                                         | -1.76 | Mm.121662 |
| 522270 | RAB member of RAS oncogene family-like 4                             | -1.76 | Mm.30191  |
| 735450 |                                                                      | -1.76 | Mm.271701 |
| 610086 |                                                                      | -1.76 | Mm.265610 |
| 685673 | elongation factor RNA polymerase II 2                                | -1.76 |           |
| 555538 | DMRT-like family B with proline-rich C-terminal 1                    | -1.76 |           |
| 722166 | integrin beta 4 binding protein                                      | -1.76 | Mm.271674 |
| 628393 | tRNA splicing endonuclease 2 homolog (SEN2 <i>S. cerevisiae</i> )    | -1.76 | Mm.291208 |
| 574782 | zinc finger DHHC domain containing 14                                | -1.76 | Mm.328751 |
| 401243 |                                                                      | -1.76 |           |
| 623858 | transmembrane protein 39a                                            | -1.76 | Mm.310476 |
| 928412 | endothelial cell-specific adhesion molecule                          | -1.75 | Mm.41751  |
| 442475 |                                                                      | -1.75 |           |
| 866152 |                                                                      | -1.75 |           |
| 911721 | nuclear receptor subfamily 4 group A member 1                        | -1.75 | Mm.119    |
| 359842 | cDNA sequence BC026744                                               | -1.75 | Mm.4079   |
| 643847 | glial cell line derived neurotrophic factor family receptor alpha 4  | -1.75 | Mm.198399 |
| 901462 | proline rich protein HaeIII subfamily 1                              | -1.75 | Mm.354963 |
| 531093 |                                                                      | -1.75 |           |
| 663116 |                                                                      | -1.74 |           |
| 612126 | gene model 519 (NCBI)                                                | -1.74 |           |
| 365724 | mitogen-activated protein kinase 8 interacting protein 3             | -1.74 | Mm.43081  |
| 916704 |                                                                      | -1.74 | Mm.24281  |
| 323302 | tripartite motif protein 8                                           | -1.74 | Mm.219613 |
| 337040 | RIKEN cDNA 2010111I01 gene                                           | -1.74 |           |
| 922033 |                                                                      | -1.74 |           |
| 608748 |                                                                      | -1.74 |           |
| 594434 | solute carrier family 16 (monocarboxylic acid transporters) member 2 | -1.74 | Mm.5045   |
| 781520 | SH3-domain binding protein 4                                         | -1.74 | Mm.170983 |

|        |                                                                              |       |           |
|--------|------------------------------------------------------------------------------|-------|-----------|
| 700731 |                                                                              | -1.74 |           |
| 503883 |                                                                              | -1.74 |           |
| 892644 |                                                                              | -1.73 | Mm.296338 |
| 782998 | membrane protein palmitoylated 5 (MAGUK p55 subfamily member 5)              | -1.73 | Mm.313594 |
| 641605 | RIKEN cDNA 1100001E04 gene                                                   | -1.73 |           |
| 359259 |                                                                              | -1.73 |           |
| 923079 | diacylglycerol kinase delta                                                  | -1.73 |           |
| 747302 |                                                                              | -1.73 |           |
| 902405 |                                                                              | -1.73 |           |
| 614729 | acyl-Coenzyme A binding domain containing 5                                  | -1.73 | Mm.181973 |
| 608623 |                                                                              | -1.73 |           |
| 897391 |                                                                              | -1.73 |           |
| 825178 | vesicle-associated membrane protein 4                                        | -1.73 | Mm.10699  |
| 760604 |                                                                              | -1.73 |           |
| 917388 | megalencephalic leukoencephalopathy with subcortical cysts 1 homolog (human) | -1.73 | Mm.32780  |
| 577469 | tubulin beta 6                                                               | -1.73 | Mm.181860 |
| 556632 |                                                                              | -1.73 |           |
| 827938 | protocadherin 10                                                             | -1.73 | Mm.242644 |
| 570468 | arrestin domain containing 1                                                 | -1.73 | Mm.45275  |
| 843424 | ligase I DNA ATP-dependent                                                   | -1.73 | Mm.288179 |
| 440444 |                                                                              | -1.73 |           |
| 514955 |                                                                              | -1.73 |           |
| 330820 | poly(A) polymerase gamma                                                     | -1.72 | Mm.61064  |
| 901987 |                                                                              | -1.72 | Mm.328846 |
| 461421 | RIKEN cDNA 2610208M17 gene                                                   | -1.72 | Mm.370550 |
| 894160 |                                                                              | -1.72 |           |
| 477588 | GDP-mannose 4 6-dehydratase                                                  | -1.72 | Mm.247143 |
| 706652 | F-box and leucine-rich repeat protein 14                                     | -1.72 | Mm.125477 |
| 393460 | pleckstrin homology domain containing family M (with RUN domain) member 2    | -1.72 |           |
| 924756 | TEA domain family member 3                                                   | -1.72 | Mm.6655   |
| 839040 | heme oxygenase (decycling) 1                                                 | -1.72 | Mm.276389 |
| 917008 | cytoplasmic FMR1 interacting protein 1                                       | -1.72 | Mm.37249  |
| 764722 |                                                                              | -1.72 |           |
| 678741 |                                                                              | -1.71 |           |
| 690156 | MAS-related GPR member F                                                     | -1.71 | Mm.215151 |
| 311243 | cellular retinoic acid binding protein II                                    | -1.71 | Mm.4757   |

|        |                                                                    |       |           |
|--------|--------------------------------------------------------------------|-------|-----------|
| 518333 | DnaJ (Hsp40) homolog subfamily A member 3                          | -1.71 | Mm.325524 |
| 456666 | cDNA sequence BC068281                                             | -1.71 | Mm.146087 |
| 869966 |                                                                    | -1.71 |           |
| 438218 | prickle-like 2 (Drosophila)                                        | -1.71 |           |
| 606938 |                                                                    | -1.71 |           |
| 573000 |                                                                    | -1.71 |           |
| 638098 |                                                                    | -1.71 |           |
| 923835 | zinc binding alcohol dehydrogenase domain containing 2             | -1.71 | Mm.147052 |
| 524894 | kelch-like 21 (Drosophila)                                         | -1.71 |           |
| 803218 | zinc finger protein 668                                            | -1.71 | Mm.207872 |
| 466137 | ankyrin repeat and FYVE domain containing 1                        | -1.71 | Mm.10313  |
| 734492 | sine oculis-related homeobox 3 homolog (Drosophila)                | -1.71 | Mm.370208 |
| 734744 | RIKEN cDNA 4930488E11 gene                                         | -1.71 | Mm.20154  |
| 921350 | growth arrest and DNA-damage-inducible gamma interacting protein 1 | -1.71 | Mm.276291 |
| 367887 | expressed sequence AI429612                                        | -1.71 | Mm.28844  |
| 710361 | high mobility group AT-hook 1                                      | -1.70 | Mm.4438   |
| 326972 | Moloney leukemia virus 10                                          | -1.70 | Mm.1597   |
| 807235 |                                                                    | -1.70 | Mm.254559 |
| 580870 | RIKEN cDNA 0610039J04 gene                                         | -1.70 | Mm.24141  |
| 745125 | cleavage and polyadenylation specific factor 1                     | -1.70 | Mm.45141  |
| 356302 | WD repeat domain 3                                                 | -1.70 | Mm.24591  |
| 914289 | meteorin glial cell differentiation regulator-like                 | -1.70 | Mm.153566 |
| 521521 |                                                                    | -1.70 |           |
| 614268 |                                                                    | -1.70 |           |
| 844330 |                                                                    | -1.70 | Mm.291901 |
| 759431 | dihydrodiol dehydrogenase (dimeric)                                | -1.70 | Mm.34208  |
| 916109 | RIKEN cDNA 1700021F05 gene                                         | -1.70 | Mm.209953 |
| 329248 |                                                                    | -1.70 |           |
| 773899 | sprouty protein with EVH-1 domain 1 related sequence               | -1.69 | Mm.245890 |
| 420293 | Kv channel interacting protein 4                                   | -1.69 | Mm.160172 |
| 313407 |                                                                    | -1.69 |           |
| 778929 | lin 7 homolog c (C. elegans)                                       | -1.69 | Mm.235300 |
| 905863 |                                                                    | -1.69 |           |
| 531694 | UDP-Gal:betaGlcNAc beta 1 4-galactosyltransferase polypeptide 3    | -1.69 | Mm.274011 |
| 387190 |                                                                    | -1.69 |           |
| 923203 | retinoid X receptor beta                                           | -1.69 | Mm.1243   |
| 744894 |                                                                    | -1.69 | Mm.275808 |

|        |                                                                         |       |           |
|--------|-------------------------------------------------------------------------|-------|-----------|
| 640447 |                                                                         | -1.69 | Mm.133370 |
| 341371 | claudin 4                                                               | -1.69 | Mm.7339   |
| 895253 |                                                                         | -1.68 | Mm.11376  |
| 498112 | calcium channel voltage-dependent beta 4 subunit                        | -1.68 | Mm.330223 |
| 383544 | eukaryotic translation initiation factor 2 subunit 2 (beta)             | -1.68 | Mm.373568 |
| 638351 |                                                                         | -1.68 |           |
| 502443 | protein kinase C zeta                                                   | -1.68 | Mm.28561  |
| 623313 |                                                                         | -1.68 | Mm.223689 |
| 426883 |                                                                         | -1.68 |           |
| 920252 | mesoderm specific transcript                                            | -1.68 | Mm.1089   |
| 477355 |                                                                         | -1.68 |           |
| 827226 | insulin-like growth factor 2 receptor                                   | -1.68 | Mm.371566 |
| 511501 | RIKEN cDNA 2410001C21 gene                                              | -1.68 | Mm.25157  |
| 576020 | RIKEN cDNA 2310033P09 gene                                              | -1.68 | Mm.358708 |
| 773069 |                                                                         | -1.68 |           |
| 528110 |                                                                         | -1.67 |           |
| 914922 | RIKEN cDNA 1110059P08 gene                                              | -1.67 | Mm.227983 |
| 713140 | G protein-coupled receptor 103                                          | -1.67 | Mm.330975 |
| 714679 | guanine monphosphate synthetase                                         | -1.67 |           |
| 462500 | adducin 2 (beta)                                                        | -1.67 | Mm.104155 |
| 692062 | phosphatidylinositol-4-phosphate 5-kinase type 1 beta                   | -1.67 | Mm.296409 |
| 684165 | ATPase Na <sup>+</sup> /K <sup>+</sup> transporting alpha 2 polypeptide | -1.67 | Mm.207432 |
| 455895 | ubiquitin specific protease 32                                          | -1.67 |           |
| 454257 |                                                                         | -1.67 |           |
| 571012 | DNA segment Chr 6 Wayne State University 176 expressed                  | -1.67 | Mm.258484 |
| 908871 | SCAN domain-containing 1                                                | -1.67 | Mm.373538 |
| 298853 | RIKEN cDNA 2810032G03 gene                                              | -1.67 | Mm.10434  |
| 427858 |                                                                         | -1.67 |           |
| 426694 | proline-rich nuclear receptor coactivator 1                             | -1.67 |           |
| 395749 | tafazzin                                                                | -1.67 | Mm.268483 |
| 515681 |                                                                         | -1.67 |           |
| 733081 | thyroid hormone receptor associated protein 2                           | -1.67 | Mm.206238 |
| 599807 | mediator of RNA polymerase II transcription subunit 8 homolog (yeast)   | -1.67 | Mm.259567 |
| 759163 | RIKEN cDNA 1810013B01 gene expressed sequence 2 embryonic lethal        | -1.66 | Mm.335427 |
| 836828 |                                                                         | -1.66 | Mm.256480 |
| 495291 | inhibitor of kappa light polypeptide                                    | -1.66 | Mm.282743 |



|        |                                                                       |       |                     |
|--------|-----------------------------------------------------------------------|-------|---------------------|
|        | enhancer in B-cells kinase complex-associated protein                 |       |                     |
| 915302 | cartilage acidic protein 1                                            | -1.66 | Mm.313558           |
| 885819 | hypothetical gene supported by AK039231; AK039519; AK039710; AK045832 | -1.66 | Mm.330987           |
| 301448 | pro-opiomelanocortin-alpha                                            | -1.66 | Mm.277996           |
| 465508 | heme binding protein 2                                                | -1.66 | Mm.35551            |
| 893813 |                                                                       | -1.66 |                     |
| 883789 | MRS2-like magnesium homeostasis factor ( <i>S. cerevisiae</i> )       | -1.66 |                     |
| 659709 | plastin 3 (T-isoform)                                                 | -1.66 | Mm.28777            |
| 606838 | cDNA sequence BC033596                                                | -1.66 |                     |
| 690255 | protein phosphatase 1D magnesium-dependent delta isoform              | -1.66 | Mm.45609            |
| 728239 | glutathione S-transferase mu 6                                        | -1.66 | Mm.347437           |
| 663849 |                                                                       | -1.66 |                     |
| 826245 | ST3 beta-galactoside alpha-2 3-sialyltransferase 3                    | -1.66 | Mm.251002           |
| 382361 | N-acetylneuraminic acid synthase (sialic acid synthase)               | -1.66 | Mm.249349           |
| 372826 | gene model 1529 (NCBI)                                                | -1.66 |                     |
| 341150 |                                                                       | -1.66 | Mm.136456;Mm.127014 |
| 762040 | pleckstrin homology-like domain family A member 2                     | -1.66 | Mm.334344           |
| 907906 |                                                                       | -1.66 | Mm.371682           |
| 659628 | Abelson helper integration site                                       | -1.65 | Mm.338387           |
| 637282 | ceroid-lipofuscinosis neuronal 6                                      | -1.65 |                     |
| 704458 |                                                                       | -1.65 |                     |
| 930882 | RIKEN cDNA A230078I05 gene                                            | -1.65 | Mm.44401            |
| 467882 | ribosomal protein L41                                                 | -1.65 | Mm.339491           |
| 916688 | hematological and neurological expressed sequence 1                   | -1.65 | Mm.1775             |
| 734579 | gene model 203 (NCBI)                                                 | -1.65 |                     |
| 894542 |                                                                       | -1.65 | Mm.371578           |
| 754818 | centaurin beta 2                                                      | -1.65 |                     |
| 346663 | gene model 1060 (NCBI)                                                | -1.65 |                     |
| 903921 | similar to small nuclear ribonucleoprotein polypeptide A (predicted)  | -1.65 |                     |
| 416164 | RIKEN cDNA 2600016J21 gene                                            | -1.65 | Mm.46488            |
| 750302 | seven in absentia 1B                                                  | -1.65 | Mm.37215            |
| 914988 | RIKEN cDNA 1700009P03 gene                                            | -1.65 | Mm.291542           |
| 363757 | ependymin related protein 2 (zebrafish)                               | -1.65 | Mm.275054           |
| 656907 | WD repeat domain 4                                                    | -1.65 | Mm.143771           |

|        |                                                                               |       |                     |
|--------|-------------------------------------------------------------------------------|-------|---------------------|
| 352918 |                                                                               | -1.65 |                     |
| 912671 | RIKEN cDNA 2510038A11 gene                                                    | -1.64 | Mm.39485            |
| 784582 | poly(rC) binding protein 1                                                    | -1.64 | Mm.274146           |
| 457671 | doublecortin and CaM kinase-like 3                                            | -1.64 | Mm.26361            |
| 725563 | COP9 (constitutive photomorphogenic) homolog subunit 3 (Arabidopsis thaliana) | -1.64 | Mm.40               |
| 621581 | proline-rich polypeptide 6                                                    | -1.64 |                     |
| 312951 |                                                                               | -1.64 |                     |
| 337107 | trinucleotide repeat containing 6a                                            | -1.64 |                     |
| 496423 | growth arrest and DNA-damage-inducible 45 alpha                               | -1.64 | Mm.1236             |
| 904330 | ring finger protein 7                                                         | -1.64 |                     |
| 633117 | mevalonate kinase                                                             | -1.64 | Mm.28088            |
| 383817 |                                                                               | -1.64 | Mm.285771           |
| 439826 | RAN binding protein 5                                                         | -1.64 | Mm.221452           |
| 760762 | uridine-cytidine kinase 1-like 1                                              | -1.64 | Mm.232400           |
| 771819 | RIKEN cDNA 3300001P08 gene                                                    | -1.64 | Mm.30927            |
| 894994 |                                                                               | -1.64 | Mm.253533;Mm.312693 |
| 788116 |                                                                               | -1.63 |                     |
| 695277 | zinc finger protein 262                                                       | -1.63 |                     |
| 643574 |                                                                               | -1.63 |                     |
| 644310 |                                                                               | -1.63 |                     |
| 798582 |                                                                               | -1.63 | Mm.334499           |
| 724733 |                                                                               | -1.63 |                     |
| 510075 | RIKEN cDNA A230065H16 gene                                                    | -1.63 |                     |
| 690389 |                                                                               | -1.63 |                     |
| 741156 | glucuronyl C5-epimerase                                                       | -1.63 | Mm.24411            |
| 352691 |                                                                               | -1.63 | Mm.40880            |
| 927656 | RIKEN cDNA 1300014I06 gene                                                    | -1.63 | Mm.28943            |
| 901986 |                                                                               | -1.63 |                     |
| 531375 | gene model 157 (NCBI)                                                         | -1.63 |                     |
| 436091 | RIKEN cDNA 2410016F19 gene                                                    | -1.63 | Mm.64104            |
| 666845 | glutamate receptor metabotropic 5                                             | -1.63 |                     |
| 592921 | phosphofructokinase platelet                                                  | -1.63 | Mm.273874           |
| 789531 | islet cell autoantigen 1                                                      | -1.63 | Mm.275683           |
| 728559 | glycolipid transfer protein                                                   | -1.63 | Mm.275766           |
| 307417 | PR domain containing 4                                                        | -1.63 |                     |
| 854412 | RIKEN cDNA A230046K03 gene                                                    | -1.63 |                     |
| 698736 | cereblon                                                                      | -1.63 | Mm.290085           |
| 872381 | Bcl2-associated athanogene 2                                                  | -1.62 | Mm.247037           |
| 900980 |                                                                               | -1.62 |                     |

|        |                                                                       |       |           |
|--------|-----------------------------------------------------------------------|-------|-----------|
| 827078 | inhibitor of kappaB kinase beta                                       | -1.62 | Mm.277886 |
| 841580 | neurolysin (metallopeptidase M3 family)                               | -1.62 | Mm.127692 |
| 355318 | RIKEN cDNA B930007L02 gene                                            | -1.62 |           |
| 739996 | growth factor erv1 (S. cerevisiae)-like (augments liver regeneration) | -1.62 | Mm.28124  |
| 503142 | like-glycosyltransferase                                              | -1.62 | Mm.324371 |
| 927136 | acetyl-Coenzyme A dehydrogenase long-chain                            | -1.62 | Mm.2445   |
| 622183 | stromal membrane-associated protein 1                                 | -1.62 | Mm.329963 |
| 334822 | sideroflexin 1                                                        | -1.62 | Mm.134191 |
| 691518 |                                                                       | -1.62 |           |
| 685490 | RIKEN cDNA 5430432P15 gene                                            | -1.62 |           |
| 728873 | zinc finger protein 261                                               | -1.62 | Mm.23458  |
| 643415 | histone deacetylase 6                                                 | -1.62 | Mm.29854  |
| 902059 |                                                                       | -1.62 | Mm.358634 |
| 900509 |                                                                       | -1.62 |           |
| 900801 |                                                                       | -1.62 | Mm.312059 |
| 447466 | F-box and WD-40 domain protein 8                                      | -1.62 | Mm.221769 |
| 848594 | WT1-interacting protein                                               | -1.62 | Mm.27482  |
| 598781 | RIKEN cDNA 2510009E07 gene                                            | -1.62 | Mm.131606 |
| 741914 | zinc finger SWIM domain containing 6                                  | -1.61 |           |
| 320345 | Rab6 interacting protein 2                                            | -1.61 | Mm.370292 |
| 653356 | far upstream element (FUSE) binding protein 3                         | -1.61 |           |
| 713041 | D site albumin promoter binding protein                               | -1.61 | Mm.3459   |
| 900403 |                                                                       | -1.61 |           |
| 726825 | methionine-tRNA synthetase 2 (mitochondrial)                          | -1.61 | Mm.19223  |
| 567409 | regulator of G-protein signaling 9                                    | -1.61 | Mm.38548  |
| 317132 |                                                                       | -1.61 |           |
| 423699 | RIKEN cDNA 1110006I15 gene                                            | -1.61 | Mm.251890 |
| 434690 | golgi phosphoprotein 2                                                | -1.61 | Mm.171335 |
| 675742 | crystallin zeta (quinone reductase)-like 1                            | -1.61 | Mm.109823 |
| 369334 | solute carrier family 35 member B1                                    | -1.61 | Mm.4593   |
| 898793 |                                                                       | -1.61 | Mm.371578 |
| 567979 |                                                                       | -1.61 |           |
| 307169 |                                                                       | -1.61 | Mm.79070  |
| 453825 |                                                                       | -1.60 |           |
| 490024 | RIKEN cDNA 6430502M16 gene                                            | -1.60 | Mm.213623 |
| 448995 |                                                                       | -1.60 |           |
| 358964 | RIKEN cDNA 1700095N21 gene                                            | -1.60 | Mm.130952 |

|        |                                                                  |       |           |
|--------|------------------------------------------------------------------|-------|-----------|
| 793761 | ribosomal protein L14                                            | -1.60 | Mm.289810 |
| 346344 | HemK methyltransferase family member 1                           | -1.60 | Mm.259467 |
| 537031 | RIKEN cDNA 1110038B12 gene                                       | -1.60 |           |
| 579368 | keratin complex 2 basic gene 6g                                  | -1.60 | Mm.358677 |
| 799854 | T-cell leukemia/lymphoma 1B 5                                    | -1.60 | Mm.241933 |
| 468172 |                                                                  | -1.60 |           |
| 886314 | RIKEN cDNA 2410018M08 gene                                       | -1.60 | Mm.327243 |
| 370258 | RIKEN cDNA 1700123O20 gene                                       | -1.60 | Mm.197509 |
| 651650 | expressed sequence AW050020                                      | -1.60 | Mm.262056 |
| 496174 | RIKEN cDNA C230078M08 gene                                       | -1.60 | Mm.133211 |
| 434261 | inositol 1 4 5-triphosphate receptor 1                           | -1.60 | Mm.227912 |
| 353849 | RIKEN cDNA 9530077C05 gene                                       | -1.60 | Mm.280669 |
| 573930 |                                                                  | -1.60 |           |
| 408185 | nuclear VCP-like                                                 | -1.60 | Mm.263464 |
| 925205 |                                                                  | -1.60 |           |
| 309058 | WD repeat domain 11                                              | -1.60 | Mm.229323 |
| 523702 | cullin 3                                                         | -1.60 | Mm.12665  |
| 431457 | RIKEN cDNA 2700067D09 gene                                       | -1.60 | Mm.373584 |
| 673505 | ATP citrate lyase                                                | -1.60 | Mm.282039 |
| 583555 | DNA segment Chr 12 ERATO Doi 771 expressed                       | -1.60 | Mm.159185 |
| 816114 | SPRY domain-containing SOCS box 4                                | -1.60 | Mm.335370 |
| 892381 |                                                                  | -1.60 | Mm.350080 |
| 536571 | cDNA sequence BC037112                                           | -1.60 |           |
| 516346 | cortistatin                                                      | -1.59 | Mm.6204   |
| 516708 | interleukin-1 receptor-associated kinase 1 binding protein 1     | -1.59 | Mm.41415  |
| 368354 |                                                                  | -1.59 |           |
| 860445 | neurexophilin 1                                                  | -1.59 | Mm.46954  |
| 794818 |                                                                  | -1.59 |           |
| 927515 | nicalin homolog (zebrafish)                                      | -1.59 | Mm.302791 |
| 755786 | membrane protein palmitoylated 6 (MAGUK p55 subfamily member 6)  | -1.59 | Mm.41288  |
| 781669 |                                                                  | -1.59 | Mm.271953 |
| 464051 | RIKEN cDNA D230025D16 gene                                       | -1.59 | Mm.334761 |
| 656612 |                                                                  | -1.59 |           |
| 378176 | inosine triphosphatase (nucleoside triphosphate pyrophosphatase) | -1.59 | Mm.21399  |
| 687426 | RIKEN cDNA 2700029E10 gene                                       | -1.59 | Mm.46742  |
| 468042 | solute carrier family 39 (metal ion transporter) member 6        | -1.59 | Mm.21688  |
| 898193 |                                                                  | -1.59 |           |
| 538756 | cDNA sequence BC025519                                           | -1.59 |           |

|        |                                                                               |       |           |
|--------|-------------------------------------------------------------------------------|-------|-----------|
| 516127 |                                                                               | -1.59 |           |
| 454349 | MAP3K12 binding inhibitory protein 1                                          | -1.59 | Mm.25656  |
| 909676 | interferon regulatory factor 2 binding protein 1                              | -1.59 | Mm.274237 |
| 659670 |                                                                               | -1.59 |           |
| 366162 |                                                                               | -1.59 |           |
| 919369 | RIKEN cDNA 1700030A21 gene                                                    | -1.59 | Mm.25661  |
| 498745 |                                                                               | -1.59 |           |
| 778903 |                                                                               | -1.59 |           |
| 924461 | glucocorticoid induced transcript 1                                           | -1.59 | Mm.210787 |
| 763789 |                                                                               | -1.59 |           |
| 454017 | replication protein A2                                                        | -1.59 | Mm.2870   |
| 796055 |                                                                               | -1.59 |           |
| 904864 | RIKEN cDNA 1110032O16 gene                                                    | -1.59 |           |
| 411501 |                                                                               | -1.59 |           |
| 664157 | coiled-coil-helix-coiled-coil-helix domain containing 5                       | -1.59 | Mm.40621  |
| 892921 |                                                                               | -1.59 | Mm.348392 |
| 930776 | DnaJ (Hsp40) homolog subfamily C member 12                                    | -1.59 | Mm.32550  |
| 430677 | glutamate receptor ionotropic AMPA2 (alpha 2)                                 | -1.58 | Mm.220224 |
| 899564 |                                                                               | -1.58 | Mm.330075 |
| 856951 |                                                                               | -1.58 |           |
| 816904 | RIKEN cDNA 2210021J22 gene                                                    | -1.58 | Mm.33706  |
| 362030 |                                                                               | -1.58 |           |
| 931120 | eukaryotic translation initiation factor 2 subunit 3 structural gene Y-linked | -1.58 | Mm.250909 |
| 547133 |                                                                               | -1.58 |           |
| 930618 | splicing factor arginine/serine rich 9                                        | -1.58 | Mm.287826 |
| 446228 | RIKEN cDNA 6330403K07 gene                                                    | -1.58 | Mm.27768  |
| 810533 | solute carrier family 39 (zinc transporter) member 1                          | -1.58 | Mm.354052 |
| 923230 | RNA binding motif protein X chromosome                                        | -1.58 | Mm.28275  |
| 868644 | polymerase (RNA) II (DNA directed) polypeptide K                              | -1.58 | Mm.27375  |
| 631969 | DnaJ (Hsp40) homolog subfamily B member 12                                    | -1.58 | Mm.103610 |
| 403289 |                                                                               | -1.58 |           |
| 330885 | adaptor-related protein complex 3 mu 1 subunit                                | -1.58 | Mm.370223 |
| 562485 | chemokine (C-C motif) ligand 7                                                | -1.58 | Mm.341574 |
| 662391 | eukaryotic translation initiation factor 2 alpha kinase 3                     | -1.58 | Mm.247167 |
| 387820 | ubiquitin protein ligase E3A                                                  | -1.58 | Mm.9002   |
| 921193 | RIKEN cDNA 2810027O19 gene                                                    | -1.58 | Mm.181767 |

|        |                                                                                         |       |                     |
|--------|-----------------------------------------------------------------------------------------|-------|---------------------|
| 476125 | neurogenin 3                                                                            | -1.58 | Mm.57236            |
| 650789 |                                                                                         | -1.58 | Mm.253836;Mm.156909 |
| 494196 | double cortin and calcium/calmodulin-dependent protein kinase-like 1                    | -1.57 | Mm.295263           |
| 931046 | G protein-coupled receptor 19                                                           | -1.57 | Mm.4787             |
| 904707 | eukaryotic translation initiation factor 4 gamma 3                                      | -1.57 | Mm.360223           |
| 681165 | olfactory receptor 386                                                                  | -1.57 |                     |
| 361141 | syntaxin binding protein 3                                                              | -1.57 | Mm.316894           |
| 522798 |                                                                                         | -1.57 |                     |
| 719517 | adaptor protein complex AP-1 sigma 1                                                    | -1.57 | Mm.833              |
| 708117 | zinc finger protein 354C                                                                | -1.57 | Mm.103674           |
| 917423 | endoplasmic reticulum protein 29                                                        | -1.57 | Mm.154570           |
| 356898 |                                                                                         | -1.57 |                     |
| 339692 | serine-arginine repressor protein sulfotransferase family 1A phenol-preferring member 1 | -1.57 | Mm.156636           |
| 619584 |                                                                                         | -1.57 | Mm.17339            |
| 405650 | RIKEN cDNA 2410004L22 gene                                                              | -1.57 | Mm.27355            |
| 508555 | RIKEN cDNA 1110014D18 gene                                                              | -1.57 | Mm.27762            |
| 459544 | protein phosphatase 1 regulatory (inhibitor) subunit 13 like                            | -1.57 | Mm.360352           |
| 565731 | phosphatase and actin regulator 4                                                       | -1.57 | Mm.331929           |
| 841470 |                                                                                         | -1.57 |                     |
| 824293 |                                                                                         | -1.57 | Mm.332257           |
| 742936 | mitochondrial ribosomal protein L3                                                      | -1.57 | Mm.29746            |
| 810326 | RIKEN cDNA 2310061I09 gene                                                              | -1.57 | Mm.7280             |
| 576743 | gene model 88 (NCBI)                                                                    | -1.57 |                     |
| 912021 | granzyme F                                                                              | -1.57 | Mm.14431            |
| 790322 |                                                                                         | -1.57 |                     |
| 898929 | golgi autoantigen golgin subfamily a 7                                                  | -1.57 | Mm.196269           |
| 559153 | carbohydrate sulfotransferase 2                                                         | -1.57 | Mm.212446           |
| 639341 | fibroblast growth factor receptor-like 1                                                | -1.57 | Mm.35691            |
| 898366 |                                                                                         | -1.57 | Mm.300639           |
| 711366 | RIKEN cDNA 1810073P09 gene                                                              | -1.57 |                     |
| 330673 |                                                                                         | -1.57 |                     |
| 886260 | olfactory receptor 1490                                                                 | -1.57 |                     |
| 605422 | zinc finger protein 322a                                                                | -1.57 | Mm.286454           |
| 369139 | translocase of outer mitochondrial membrane 70 homolog A (yeast)                        | -1.57 | Mm.373552           |
| 818145 | olfactory receptor 544                                                                  | -1.57 |                     |
| 559508 | mannose phosphate isomerase 1                                                           | -1.57 |                     |
| 407336 | potassium channel tetramerisation domain containing 12b                                 | -1.57 | Mm.271572           |

|        |                                                            |       |           |
|--------|------------------------------------------------------------|-------|-----------|
| 879389 | transcription elongation factor A (SII)<br>2               | -1.57 | Mm.24245  |
| 721129 | RIKEN cDNA 1700027J05 gene                                 | -1.57 | Mm.358725 |
| 360759 | RIKEN cDNA 1810045K17 gene                                 | -1.57 | Mm.28917  |
| 896360 |                                                            | -1.57 |           |
| 899413 | olfactory receptor 154                                     | -1.56 |           |
| 925886 | DAZ associated protein 1                                   | -1.56 | Mm.148693 |
| 302170 |                                                            | -1.56 |           |
| 919801 |                                                            | -1.56 |           |
| 542293 |                                                            | -1.56 |           |
| 901776 | mitochondrial ribosomal protein L23                        | -1.56 | Mm.12144  |
| 652721 | cystin 1                                                   | -1.56 | Mm.359851 |
| 370560 | cyclin L1                                                  | -1.56 | Mm.175612 |
| 560089 | src homology 2 domain-containing<br>transforming protein D | -1.56 | Mm.20908  |
| 515114 | RIKEN cDNA A930004K21 gene                                 | -1.56 | Mm.293284 |
| 505490 | zinc finger protein 40                                     | -1.56 | Mm.21025  |
| 793521 | DEAH (Asp-Glu-Ala-His) box<br>polypeptide 38               | -1.56 | Mm.23705  |
| 381222 |                                                            | -1.56 | Mm.371625 |
| 573106 | RIKEN cDNA 4732471D19 gene                                 | -1.56 | Mm.342789 |
| 561061 |                                                            | -1.56 |           |
| 499733 |                                                            | -1.56 |           |
| 477531 | mannosidase beta A lysosomal-like                          | -1.56 |           |
| 825608 |                                                            | -1.56 |           |
| 660792 | tripartite motif protein 46                                | -1.56 | Mm.331156 |
| 829098 | trophinin                                                  | -1.56 | Mm.3597   |
| 832595 | amylo-1 6-glucosidase 4-alpha-<br>glucanotransferase       | -1.56 |           |
| 359931 | similar to Shb-like adapter protein Shf<br>- human         | -1.56 |           |
| 412527 |                                                            | -1.56 |           |
| 779097 | RIKEN cDNA 0610037P05 gene                                 | -1.56 | Mm.42072  |
| 932312 | RIKEN cDNA 2610002J02 gene                                 | -1.56 |           |
| 738014 | RIKEN cDNA 1110007A13 gene                                 | -1.56 | Mm.97383  |
| 510371 | RIKEN cDNA 5730457F11 gene                                 | -1.56 | Mm.87319  |
| 727418 | RIKEN cDNA 1200008A14 gene                                 | -1.56 | Mm.257449 |
| 916489 | porcupine homolog (Drosophila)                             | -1.56 | Mm.153107 |
| 456584 | mitochondrial ribosomal protein S35                        | -1.55 | Mm.46656  |
| 916476 | zinc finger DHHC domain containing<br>4                    | -1.55 | Mm.261606 |
| 891940 |                                                            | -1.55 | Mm.319719 |
| 724987 | solute carrier family 39 (zinc<br>transporter) member 3    | -1.55 | Mm.5353   |
| 538620 | tachykinin 1                                               | -1.55 | Mm.1440   |

|        |                                                            |       |           |
|--------|------------------------------------------------------------|-------|-----------|
| 581283 | olfactory receptor 1449                                    | -1.55 | Mm.329749 |
| 868762 | transcription factor CP2                                   | -1.55 | Mm.219040 |
| 723765 | importin 13                                                | -1.55 | Mm.287810 |
| 644897 | myoneurin                                                  | -1.55 | Mm.200378 |
| 707801 | FGFR1 oncogene partner 2                                   | -1.55 | Mm.333499 |
| 379659 | glutamyl-prolyl-tRNA synthetase                            | -1.55 |           |
| 313142 | RIKEN cDNA 2500001K11 gene                                 | -1.55 | Mm.322656 |
| 499918 | mitogen activated protein kinase 13                        | -1.55 | Mm.27970  |
| 766447 | protein tyrosine phosphatase receptor type N               | -1.55 | Mm.2902   |
| 680529 | solute carrier family 30 (zinc transporter) member 9       | -1.55 | Mm.234455 |
| 555604 | RIKEN cDNA A630007B06 gene                                 | -1.55 | Mm.131555 |
| 488156 |                                                            | -1.55 |           |
| 398278 |                                                            | -1.55 |           |
| 921380 | embryonal Fyn-associated substrate                         | -1.55 | Mm.236438 |
| 676587 |                                                            | -1.55 |           |
| 446128 | ST3 beta-galactoside alpha-2 3-sialyltransferase 4         | -1.55 | Mm.275973 |
| 893279 | karyopherin (importin) beta 1                              | -1.55 | Mm.251013 |
| 783232 | leucine rich repeat (in FLII) interacting protein 1        | -1.55 | Mm.45039  |
| 756242 | adaptor protein complex AP-2 alpha 2 subunit               | -1.55 | Mm.253090 |
| 330310 | RAD23a homolog (S. cerevisiae)                             | -1.55 | Mm.255539 |
| 651746 | RIKEN cDNA 5031400M07 gene                                 | -1.55 | Mm.142843 |
| 900297 | brain protein 17                                           | -1.55 | Mm.373560 |
| 843786 | RIKEN cDNA 0610012D09 gene                                 | -1.55 | Mm.29122  |
| 900610 |                                                            | -1.55 | Mm.330692 |
| 506914 | serine (or cysteine) proteinase inhibitor clade F member 2 | -1.55 | Mm.279733 |
| 902024 | superoxide dismutase 1 soluble                             | -1.55 | Mm.276325 |
| 872413 |                                                            | -1.55 |           |
| 908080 | low density lipoprotein receptor-related protein 1         | -1.55 | Mm.271854 |
| 619777 | ADP-ribosylation factor GTPase activating protein 3        | -1.55 | Mm.258910 |
| 563158 | mitochondrial ribosomal protein S9                         | -1.55 | Mm.252982 |
| 480339 | branched chain ketoacid dehydrogenase kinase               | -1.55 | Mm.8903   |
| 916666 | decapping enzyme scavenger                                 | -1.55 | Mm.229110 |
| 423425 | RIKEN cDNA 4631423B10 gene                                 | -1.54 | Mm.358817 |
| 931116 | kinesin-associated protein 3                               | -1.54 | Mm.4651   |
| 660182 | dynein 2 light intermediate chain                          | -1.54 | Mm.246119 |
| 531120 | calcium/calmodulin-dependent protein kinase I              | -1.54 | Mm.277373 |



|        |                                                                                    |       |           |
|--------|------------------------------------------------------------------------------------|-------|-----------|
| 602516 | expressed sequence AI450540                                                        | -1.54 | Mm.358870 |
| 443365 | betacellulin epidermal growth factor family member                                 | -1.54 | Mm.2024   |
| 893658 |                                                                                    | -1.54 | Mm.337074 |
| 417276 | RIKEN cDNA 4930430F08 gene                                                         | -1.54 | Mm.268474 |
| 620644 | heat shock 70kDa protein 4 like                                                    | -1.54 | Mm.359884 |
| 917978 | cytochrome b-245 alpha polypeptide                                                 | -1.54 | Mm.271671 |
| 668653 | RIKEN cDNA 3300001H21 gene                                                         | -1.54 | Mm.220975 |
| 866961 | RIKEN cDNA 5330439J01 gene                                                         | -1.54 | Mm.153750 |
| 485442 | erythrocyte protein band 4.1-like 4a                                               | -1.54 | Mm.3465   |
| 593476 | DNA segment Chr 6 Wayne State University 163 expressed                             | -1.54 | Mm.44228  |
| 922495 | UDP-N-acetyl-alpha-D-galactosamine:polypeptide N-acetylgalactosaminyltransferase 2 | -1.54 | Mm.33808  |
| 501817 |                                                                                    | -1.54 |           |
| 855567 | von Hippel-Lindau binding protein 1                                                | -1.54 | Mm.8294   |
| 799772 | DNA segment Chr 15 ERATO Doi 682 expressed                                         | -1.54 | Mm.12255  |
| 427293 | inhibin beta-A                                                                     | -1.54 | Mm.8042   |
| 371118 | microtubule-associated protein 1 B                                                 | -1.54 | Mm.4173   |
| 897585 | olfactory receptor 1448                                                            | -1.53 | Mm.223131 |
| 616642 | heat shock protein 105                                                             | -1.53 | Mm.270681 |
| 907161 | phosphatidylserine receptor                                                        | -1.53 | Mm.24997  |
| 831603 | muted                                                                              | -1.53 | Mm.261554 |
| 751069 | peroxiredoxin 6                                                                    | -1.53 | Mm.186185 |
| 492094 | zinc finger DHHC domain containing 1                                               | -1.53 | Mm.100917 |
| 347421 | RIKEN cDNA 2310079F23 gene                                                         | -1.53 | Mm.98522  |
| 732498 |                                                                                    | -1.53 |           |
| 832064 | stromal interaction molecule 2                                                     | -1.53 |           |
| 451679 | diacylglycerol kinase beta                                                         | -1.53 | Mm.242576 |
| 726321 | pyruvate dehydrogenase kinase isoenzyme 1                                          | -1.53 | Mm.34411  |
| 901598 | ring finger protein 184                                                            | -1.53 |           |
| 493638 |                                                                                    | -1.53 |           |
| 303657 |                                                                                    | -1.53 | Mm.30010  |
| 519774 |                                                                                    | -1.53 |           |
| 343849 | guanosine diphosphate (GDP) dissociation inhibitor 2                               | -1.53 | Mm.8070   |
| 653495 | RIKEN cDNA A430107D22 gene                                                         | -1.53 |           |
| 893631 |                                                                                    | -1.53 |           |
| 904311 |                                                                                    | -1.53 |           |
| 910380 | LETM1 domain containing 1                                                          | -1.53 | Mm.275272 |
| 694931 | RIKEN cDNA 2810421I24 gene                                                         | -1.53 | Mm.30965  |

|        |                                                                               |       |                    |
|--------|-------------------------------------------------------------------------------|-------|--------------------|
| 689792 | RIKEN cDNA 2310004K06 gene                                                    | -1.53 | Mm.240668          |
| 896858 |                                                                               | -1.53 | Mm.13886           |
| 680551 | lung carcinoma myc related oncogene 1                                         | -1.53 | Mm.1055            |
| 685710 |                                                                               | -1.53 | Mm.344708          |
| 433903 |                                                                               | -1.52 | Mm.234165          |
| 796107 | G protein-coupled receptor 146                                                | -1.52 | Mm.270003          |
| 507321 | CBFA2T1 identified gene homolog (human)                                       | -1.52 | Mm.4909            |
| 436885 | inhibitor of DNA binding 4                                                    | -1.52 | Mm.373528          |
| 412352 | HGF-regulated tyrosine kinase substrate                                       | -1.52 | Mm.7919            |
| 921189 |                                                                               | -1.52 | Mm.27660           |
| 797291 | solute carrier family 25 (mitochondrial carrier citrate transporter) member 1 | -1.52 | Mm.229291          |
| 764159 | mitogen activated protein kinase kinase 4                                     | -1.52 | Mm.27491           |
| 538485 |                                                                               | -1.52 |                    |
| 906736 | aldehyde dehydrogenase family 6 subfamily A1                                  | -1.52 | Mm.247510          |
| 416221 | G kinase anchoring protein 1                                                  | -1.52 | Mm.296625          |
| 645194 | RIKEN cDNA 4632411B12 gene                                                    | -1.52 | Mm.24734           |
| 900318 |                                                                               | -1.52 |                    |
| 419682 | mitochondrial ribosomal protein S18B                                          | -1.52 | Mm.371940          |
| 900896 |                                                                               | -1.52 |                    |
| 914472 | sorting nexin 16                                                              | -1.52 | Mm.18110           |
| 871874 |                                                                               | -1.52 |                    |
| 682171 | RIKEN cDNA 0610042I15 gene                                                    | -1.52 | Mm.294821          |
| 856453 | down-regulator of transcription 1                                             | -1.52 | Mm.303534          |
| 856386 | aspartoacylase (aminoacylase) 2                                               | -1.52 | Mm.293574          |
| 929605 | ATP-binding cassette sub-family B (MDR/TAP) member 10                         | -1.52 | Mm.274243          |
| 350159 | ATP synthase H <sup>+</sup> transporting mitochondrial F1F0 complex subunit e | -1.52 | Mm.136093          |
| 622762 |                                                                               | -1.52 |                    |
| 506712 |                                                                               | -1.52 | Mm.315343;Mm.27090 |
| 496413 |                                                                               | -1.52 |                    |
| 363646 |                                                                               | -1.52 |                    |
| 794880 | translin-associated factor X                                                  | -1.52 | Mm.5248            |
| 640761 |                                                                               | -1.52 |                    |
| 655533 | guanine nucleotide binding protein (G protein) gamma 12                       | -1.52 | Mm.234342          |
| 500013 | UDP-glucose dehydrogenase                                                     | -1.52 | Mm.344831          |
| 907180 | dentatorubral pallidolusian atrophy                                           | -1.52 | Mm.333380          |

|        |                                                                                 |       |                               |
|--------|---------------------------------------------------------------------------------|-------|-------------------------------|
| 696811 | REST corepressor 2                                                              | -1.52 | Mm.283859                     |
| 777628 | cullin 5                                                                        | -1.52 | Mm.218910                     |
| 397812 | RIKEN cDNA 2010004A03 gene                                                      | -1.52 | Mm.77697                      |
| 627396 | insulin-like growth factor 2                                                    | -1.52 | Mm.3862                       |
| 752039 |                                                                                 | -1.51 |                               |
| 507648 |                                                                                 | -1.51 |                               |
| 909756 | DnaJ (Hsp40) homolog subfamily B member 11                                      | -1.51 | Mm.37516                      |
| 861185 | protein kinase AMP-activated gamma 1 non-catalytic subunit                      | -1.51 | Mm.6670                       |
| 861007 | RIKEN cDNA C130010K08 gene                                                      | -1.51 |                               |
| 650447 | xeroderma pigmentosum complementation group A                                   | -1.51 | Mm.247036                     |
| 876186 |                                                                                 | -1.51 |                               |
| 601823 | tetraspanin 6                                                                   | -1.51 | Mm.358674                     |
| 340848 | RIKEN cDNA 5830457O10 gene                                                      | -1.51 | Mm.28552                      |
| 604793 |                                                                                 | -1.51 |                               |
| 516081 | zinc finger protein 445                                                         | -1.51 | Mm.326477                     |
| 834097 | SLIT and NTRK-like family member 3                                              | -1.51 | Mm.331076                     |
| 649808 |                                                                                 | -1.51 |                               |
| 653285 | doublecortin and CaM kinase-like 2                                              | -1.51 | Mm.44490                      |
| 405234 | ubiquitin-conjugating enzyme E2B RAD6 homology (S. cerevisiae)                  | -1.51 | Mm.280233                     |
| 879393 |                                                                                 | -1.51 | Mm.129840;Mm.358990;Mm.348047 |
| 901029 |                                                                                 | -1.51 |                               |
| 434699 | N-deacetylase/N-sulfotransferase (heparan glucosaminy) 1                        | -1.51 | Mm.181862                     |
| 853114 | potassium large conductance calcium-activated channel subfamily M beta member 4 | -1.51 | Mm.272157                     |
| 381243 | piccolo (presynaptic cytomatrix protein)                                        | -1.51 | Mm.332219                     |
| 372345 | low density lipoprotein-related protein 1B (deleted in tumors)                  | -1.51 | Mm.314288                     |
| 922907 | mitogen activated protein kinase kinase kinase 12                               | -1.51 | Mm.172897                     |
| 926308 | phospholipase A2 group VI                                                       | -1.51 | Mm.155620                     |
| 902002 |                                                                                 | -1.51 |                               |
| 895344 |                                                                                 | -1.51 | Mm.2756                       |
| 705411 | cleavage and polyadenylation specific factor 6                                  | -1.51 |                               |
| 307797 |                                                                                 | -1.51 |                               |
| 310004 |                                                                                 | -1.51 |                               |
| 923767 |                                                                                 | -1.51 |                               |
| 316375 | DEAD (Asp-Glu-Ala-Asp) box polypeptide 28                                       | -1.51 | Mm.307515                     |

|        |                                                                                                       |       |                     |
|--------|-------------------------------------------------------------------------------------------------------|-------|---------------------|
| 883587 | forkhead box P4                                                                                       | -1.51 | Mm.240062           |
| 815360 |                                                                                                       | -1.51 |                     |
| 747719 | peroxisome proliferative activated receptor gamma coactivator 1 alpha                                 | -1.50 | Mm.347722           |
| 383472 | dehydrogenase/reductase (SDR family) member 6                                                         | -1.50 | Mm.45121            |
| 887925 | protein kinase cAMP dependent regulatory type II alpha                                                | -1.50 | Mm.253102           |
| 313764 |                                                                                                       | -1.50 |                     |
| 335749 |                                                                                                       | -1.50 |                     |
| 504435 |                                                                                                       | -1.50 |                     |
| 544993 |                                                                                                       | -1.50 |                     |
| 600098 | RIKEN cDNA 5330420D20 gene                                                                            | -1.50 | Mm.252862           |
| 614015 | formin binding protein 1-like                                                                         | -1.50 | Mm.209491           |
| 435261 | cDNA sequence BC021611                                                                                | -1.50 | Mm.334875           |
| 379020 |                                                                                                       | 1.50  |                     |
| 550403 | FXYD domain-containing ion transport regulator 1                                                      | 1.50  | Mm.1491             |
| 896773 |                                                                                                       | 1.50  |                     |
| 754469 |                                                                                                       | 1.50  |                     |
| 620405 |                                                                                                       | 1.50  | Mm.290868           |
| 510014 | signal transducer and activator of transcription interacting protein 1                                | 1.50  | Mm.25298            |
| 328533 |                                                                                                       | 1.50  |                     |
| 931645 | transmembrane 4 superfamily member 11                                                                 | 1.50  | Mm.279977           |
| 900178 | RIKEN cDNA 2610318K02 gene                                                                            | 1.50  | Mm.220942           |
| 662059 |                                                                                                       | 1.50  | Mm.589              |
| 896014 | eukaryotic translation initiation factor 2 subunit 3 structural gene X-linked                         | 1.50  | Mm.218851           |
| 491273 | RIKEN cDNA C030002N13 gene                                                                            | 1.50  | Mm.29118            |
| 466093 | RIKEN cDNA 1110012M11 gene                                                                            | 1.50  | Mm.307770           |
| 926789 | ubiquitin carboxy-terminal hydrolase L1                                                               | 1.50  | Mm.29807            |
| 914247 | RIKEN cDNA 2310079N02 gene                                                                            | 1.51  | Mm.25296            |
| 583411 | glioblastoma amplified sequence LSM3 homolog U6 small nuclear RNA associated ( <i>S. cerevisiae</i> ) | 1.51  | Mm.12468            |
| 580691 |                                                                                                       | 1.51  | Mm.246693           |
| 347342 | protein tyrosine phosphatase 4a2                                                                      | 1.51  | Mm.193688           |
| 414755 | survivor of motor neuron protein interacting protein 1                                                | 1.51  | Mm.35353            |
| 416604 |                                                                                                       | 1.51  | Mm.269613;Mm.328835 |
| 347094 | speckle-type POZ protein                                                                              | 1.51  | Mm.285454           |
| 829355 | MON1 homolog b (yeast)                                                                                | 1.51  | Mm.74689            |
| 339239 | dynactin 2                                                                                            | 1.51  | Mm.167537           |
| 864310 | collagen triple helix repeat containing                                                               | 1.51  |                     |

|        |                                                                         |      |           |
|--------|-------------------------------------------------------------------------|------|-----------|
|        | 1                                                                       |      |           |
| 396014 |                                                                         | 1.51 |           |
| 477069 | fibroblast growth factor receptor substrate 3                           | 1.51 | Mm.89912  |
| 385737 | RIKEN cDNA 1110049F12 gene                                              | 1.51 | Mm.29131  |
| 321554 | tweety homolog 2 (Drosophila)                                           | 1.51 | Mm.271934 |
| 687684 | RIKEN cDNA 4932415G12 gene                                              | 1.51 | Mm.116284 |
| 401451 | thioesterase superfamily member 2                                       | 1.51 | Mm.2125   |
| 371775 | coagulation factor III                                                  | 1.51 | Mm.273188 |
| 892517 |                                                                         | 1.51 |           |
| 448746 |                                                                         | 1.51 |           |
| 517258 |                                                                         | 1.51 |           |
| 907890 |                                                                         | 1.51 | Mm.247203 |
| 423438 | expressed sequence AL022779                                             | 1.51 |           |
| 422516 | zinc finger protein 98                                                  | 1.52 | Mm.10103  |
| 742598 |                                                                         | 1.52 |           |
| 310064 |                                                                         | 1.52 |           |
| 494792 | cell division cycle 2-like 1                                            | 1.52 | Mm.267410 |
| 366314 | RIKEN cDNA B230380D07 gene                                              | 1.52 | Mm.170855 |
| 744720 | Cd200 antigen                                                           | 1.52 | Mm.245851 |
| 435770 | Mid1 interacting protein 1 (gastrulation specific G12-like (zebrafish)) | 1.52 | Mm.29429  |
| 768683 | Park2 co-regulated                                                      | 1.52 |           |
| 646163 | anaphase promoting complex subunit 2                                    | 1.52 | Mm.291624 |
| 814721 |                                                                         | 1.52 |           |
| 762760 | DNA segment Chr 14 ERATO Doi 436 expressed                              | 1.52 | Mm.287279 |
| 590437 | RIKEN cDNA C030025P15 gene                                              | 1.52 | Mm.101432 |
| 363517 | OCIA domain containing 2                                                | 1.52 | Mm.274892 |
| 813192 | RIKEN cDNA 2810432D09 gene                                              | 1.52 | Mm.90071  |
| 906740 | RIKEN cDNA 2310057D15 gene                                              | 1.52 | Mm.11311  |
| 896122 |                                                                         | 1.52 | Mm.262000 |
| 301819 | myelin and lymphocyte protein T-cell differentiation protein            | 1.53 | Mm.39040  |
| 534221 |                                                                         | 1.53 |           |
| 721827 | olfactory receptor 523                                                  | 1.53 | Mm.334306 |
| 603800 |                                                                         | 1.53 |           |
| 498790 | guanine nucleotide binding protein (G protein) gamma 2 subunit          | 1.53 | Mm.359907 |
| 561312 |                                                                         | 1.53 |           |
| 571135 |                                                                         | 1.53 |           |
| 892310 |                                                                         | 1.53 |           |
| 727724 |                                                                         | 1.53 |           |

|        |                                                                   |      |           |
|--------|-------------------------------------------------------------------|------|-----------|
| 742436 | inositol polyphosphate-5-phosphatase A                            | 1.53 | Mm.277096 |
| 568926 | RIKEN cDNA 5133401N09 gene                                        | 1.53 | Mm.293919 |
| 604052 | RIKEN cDNA C920006O11 gene                                        | 1.53 |           |
| 929172 | serologically defined colon cancer antigen 33                     | 1.53 |           |
| 356089 | RIKEN cDNA B230113M03 gene                                        | 1.53 | Mm.243950 |
| 320727 | RIKEN cDNA 2310010G13 gene                                        | 1.53 | Mm.34920  |
| 898453 | NADH dehydrogenase (ubiquinone) 1 subcomplex unknown 2            | 1.53 | Mm.334031 |
| 511504 | DNA segment Chr 10 ERATO Doi 438 expressed                        | 1.53 | Mm.199964 |
| 931346 | ubiquinol-cytochrome c reductase Rieske iron-sulfur polypeptide 1 | 1.53 | Mm.181933 |
| 476672 | RIKEN cDNA 5430431G03 gene                                        | 1.53 | Mm.44546  |
| 903671 |                                                                   | 1.53 |           |
| 902725 |                                                                   | 1.53 | Mm.180873 |
| 358126 |                                                                   | 1.53 |           |
| 852114 | gene model 672 (NCBI)                                             | 1.53 | Mm.36745  |
| 474964 |                                                                   | 1.53 |           |
| 469523 |                                                                   | 1.53 |           |
| 758898 | DEAD (Asp-Glu-Ala-Asp) box polypeptide 52                         | 1.53 | Mm.280544 |
| 436095 | RAB18 member RAS oncogene family                                  | 1.53 | Mm.132802 |
| 424077 |                                                                   | 1.53 |           |
| 321632 | zinc finger protein multitype 2                                   | 1.53 | Mm.39496  |
| 737581 | DNA segment Chr 11 ERATO Doi 498 expressed                        | 1.54 | Mm.35817  |
| 731749 | eukaryotic translation initiation factor 4B                       | 1.54 | Mm.360534 |
| 795835 | RIKEN cDNA 0610007P14 gene                                        | 1.54 | Mm.143795 |
| 894433 |                                                                   | 1.54 |           |
| 636633 |                                                                   | 1.54 |           |
| 430204 |                                                                   | 1.54 |           |
| 671675 | RIKEN cDNA 2600005N12 gene                                        | 1.54 | Mm.103384 |
| 564017 |                                                                   | 1.54 |           |
| 791853 |                                                                   | 1.54 |           |
| 929926 | deoxythymidylate kinase                                           | 1.54 | Mm.250332 |
| 892140 | RIKEN cDNA 4921531G14 gene                                        | 1.54 | Mm.244512 |
| 704247 |                                                                   | 1.54 |           |
| 586308 | secretagogin EF-hand calcium binding protein                      | 1.54 | Mm.255667 |
| 709901 | DNA segment Chr 8 ERATO Doi 594 expressed                         | 1.54 | Mm.350323 |
| 901878 |                                                                   | 1.54 |           |
| 874907 | carboxypeptidase E                                                | 1.54 | Mm.31395  |

|        |                                                                                    |      |           |
|--------|------------------------------------------------------------------------------------|------|-----------|
| 324532 | similar to Na <sup>+</sup> dependent glucose transporter 1                         | 1.54 |           |
| 817008 | RIKEN cDNA 2310034C09 gene                                                         | 1.54 | Mm.160339 |
| 329288 | zinc finger protein 623                                                            | 1.54 | Mm.273264 |
| 894561 |                                                                                    | 1.54 |           |
| 758320 | CDC-like kinase 2                                                                  | 1.54 | Mm.288098 |
| 586957 | DIX domain containing 1                                                            | 1.54 | Mm.82598  |
| 410892 | synaptophysin-like protein                                                         | 1.54 | Mm.246304 |
| 391087 | cytidine deaminase                                                                 | 1.54 | Mm.46182  |
| 391496 | RIKEN cDNA 2410018G20 gene                                                         | 1.54 | Mm.22351  |
| 705442 | RAS guanyl releasing protein 2                                                     | 1.54 | Mm.77017  |
| 674079 |                                                                                    | 1.55 |           |
| 897399 |                                                                                    | 1.55 | Mm.643    |
| 896822 |                                                                                    | 1.55 |           |
| 861059 | RIKEN cDNA 4933433P14 gene                                                         | 1.55 | Mm.248019 |
| 355517 | signal sequence receptor alpha                                                     | 1.55 | Mm.138725 |
| 371523 | heat-responsive protein 12                                                         | 1.55 | Mm.143977 |
| 900296 |                                                                                    | 1.55 |           |
| 355918 |                                                                                    | 1.55 | Mm.269474 |
| 448669 |                                                                                    | 1.55 |           |
| 602294 |                                                                                    | 1.55 |           |
| 743549 | guanine nucleotide binding protein-like 3 (nucleolar)                              | 1.55 | Mm.88512  |
| 550437 | RIKEN cDNA D730019B10 gene                                                         | 1.55 | Mm.140055 |
| 402854 | monoglyceride lipase                                                               | 1.55 | Mm.272197 |
| 649495 | cofactor required for Sp1 transcriptional activation subunit 8                     | 1.55 | Mm.330109 |
| 380086 |                                                                                    | 1.55 |           |
| 767850 | Dip3 beta                                                                          | 1.55 | Mm.282985 |
| 589177 | UDP-N-acetyl-alpha-D-galactosamine:polypeptide N-acetylgalactosaminyltransferase 1 | 1.55 | Mm.30249  |
| 502559 |                                                                                    | 1.55 |           |
| 926911 | pleckstrin homology domain containing family J member 1                            | 1.55 | Mm.41479  |
| 933122 |                                                                                    | 1.55 | Mm.298467 |
| 534344 | SET and MYND domain containing 2                                                   | 1.55 | Mm.156895 |
| 902972 |                                                                                    | 1.56 | Mm.330692 |
| 674946 | RIKEN cDNA 2700088M22 gene                                                         | 1.56 | Mm.293181 |
| 400047 | microtubule-associated protein 2                                                   | 1.56 | Mm.256966 |
| 424957 | tubulin-specific chaperone c                                                       | 1.56 | Mm.33780  |
| 462742 |                                                                                    | 1.56 |           |
| 529324 | ADP-ribosylation factor related protein 2                                          | 1.56 | Mm.365328 |

|        |                                                                        |      |                     |
|--------|------------------------------------------------------------------------|------|---------------------|
| 924153 |                                                                        | 1.56 |                     |
| 863247 |                                                                        | 1.56 |                     |
| 931802 | DNA segment Chr 11 ERATO Doi 333 expressed                             | 1.56 | Mm.44226            |
| 729484 | X-ray repair complementing defective repair in Chinese hamster cells 1 | 1.56 | Mm.4347             |
| 754880 | COBW domain containing 1                                               | 1.56 | Mm.272127           |
| 332213 | fetal Alzheimer antigen                                                | 1.56 |                     |
| 433634 | RIKEN cDNA 5730568A12 gene                                             | 1.56 | Mm.128227           |
| 779444 |                                                                        | 1.56 |                     |
| 841966 |                                                                        | 1.56 |                     |
| 597793 | transcription factor 4                                                 | 1.56 | Mm.139815           |
| 871702 | myeloid ecotropic viral integration site 1                             | 1.56 | Mm.356578           |
| 327658 | MAD homolog 5 (Drosophila)                                             | 1.56 | Mm.272920           |
| 906306 | transformation related protein 53 inducible nuclear protein 1          | 1.56 | Mm.28708            |
| 900342 |                                                                        | 1.56 | Mm.327216;Mm.335942 |
| 631704 | demethyl-Q 7                                                           | 1.56 | Mm.20634            |
| 909961 | guanine nucleotide binding protein (G protein) gamma 11                | 1.56 | Mm.25547            |
| 511812 | BCL2/adenovirus E1B 19kDa-interacting protein 1 NIP1                   | 1.56 | Mm.21795            |
| 613360 | hydroxyacyl glutathione hydrolase                                      | 1.56 | Mm.43784            |
| 642268 | zinc finger protein 189                                                | 1.56 | Mm.186994           |
| 927900 | zinc finger CCHC domain containing 12                                  | 1.56 | Mm.297698           |
| 481078 |                                                                        | 1.56 |                     |
| 892920 | eukaryotic translation initiation factor 3 subunit 10 (theta)          | 1.56 | Mm.2238             |
| 922484 |                                                                        | 1.56 | Mm.648;Mm.180750    |
| 753913 | protocadherin beta 22                                                  | 1.57 | Mm.348054           |
| 920463 | microsomal glutathione S-transferase 3                                 | 1.57 | Mm.218286           |
| 487686 | adenylate cyclase activating polypeptide 1 receptor 1                  | 1.57 | Mm.44245            |
| 899560 | cDNA sequence BC002236                                                 | 1.57 | Mm.338784           |
| 741122 | DNA segment Chr 17 ERATO Doi 288 expressed                             | 1.57 | Mm.196330           |
| 453584 |                                                                        | 1.57 | Mm.276016           |
| 898626 | exostoses (multiple)-like 3                                            | 1.57 | Mm.103748           |
| 347580 | RIKEN cDNA 3110009E18 gene                                             | 1.57 | Mm.271602           |
| 430591 | RIKEN cDNA 5730455P16 gene                                             | 1.57 |                     |
| 930071 | proline-rich nuclear receptor coactivator 2                            | 1.57 | Mm.29159            |
| 774391 |                                                                        | 1.57 |                     |
| 822304 | ADP-ribosylation factor 4-like                                         | 1.57 | Mm.266840           |



|        |                                                                 |      |           |
|--------|-----------------------------------------------------------------|------|-----------|
| 341403 | RIKEN cDNA 9330175B01 gene                                      | 1.57 |           |
| 720721 | olfactory receptor 20                                           | 1.57 | Mm.246526 |
| 910616 | GPI-anchored membrane protein 1                                 | 1.57 | Mm.254134 |
| 672509 | congenital dyserythropoietic anemia type I (human)              | 1.57 |           |
| 733592 |                                                                 | 1.57 |           |
| 621903 |                                                                 | 1.57 |           |
| 558482 | kelch-like 13 (Drosophila)                                      | 1.57 | Mm.224306 |
| 726586 | RIKEN cDNA 2900002H16 gene                                      | 1.57 | Mm.41180  |
| 925766 | DEAD (Asp-Glu-Ala-Asp) box polypeptide 25                       | 1.58 | Mm.291723 |
| 780663 | SID1 transmembrane family member 2                              | 1.58 | Mm.200859 |
| 903158 | Tu translation elongation factor mitochondrial                  | 1.58 | Mm.197829 |
| 928805 | exportin 6                                                      | 1.58 | Mm.235663 |
| 913930 | RIKEN cDNA 4930517K11 gene                                      | 1.58 | Mm.23690  |
| 932428 | acidic (leucine-rich) nuclear phosphoprotein 32 family member E | 1.58 | Mm.218657 |
| 796902 |                                                                 | 1.58 |           |
| 906385 | protein phosphatase 2A regulatory subunit B (PR 53)             | 1.58 | Mm.275393 |
| 793512 | testis expressed gene 261                                       | 1.58 | Mm.28371  |
| 672607 | uroporphyrinogen decarboxylase                                  | 1.58 | Mm.46484  |
| 924203 | ubiquitin specific protease 52                                  | 1.58 | Mm.244183 |
| 397738 |                                                                 | 1.58 | Mm.220038 |
| 930927 | zinc finger CCHC domain containing 10                           | 1.58 | Mm.288072 |
| 559083 | bromodomain containing 1                                        | 1.58 |           |
| 869342 |                                                                 | 1.58 |           |
| 855531 | NIMA (never in mitosis gene a)-related expressed kinase 4       | 1.58 | Mm.251494 |
| 482840 | cDNA sequence BC027342                                          | 1.58 | Mm.29046  |
| 780705 |                                                                 | 1.58 |           |
| 675985 | YEATS domain containing 4                                       | 1.58 | Mm.233529 |
| 695308 | IBR domain containing 3                                         | 1.58 |           |
| 666673 | zinc finger protein 112                                         | 1.58 | Mm.82678  |
| 516236 | DNA segment Chr 12 ERATO Doi 553 expressed                      | 1.58 | Mm.275699 |
| 488282 |                                                                 | 1.58 |           |
| 818745 |                                                                 | 1.58 |           |
| 913984 | regulator of G-protein signaling 17                             | 1.58 | Mm.44606  |
| 899752 |                                                                 | 1.58 |           |
| 367142 | testis expressed gene 10                                        | 1.59 |           |
| 784472 | phosphatidylserine synthase 1                                   | 1.59 | Mm.281464 |
| 595088 | sorting nexin 12                                                | 1.59 | Mm.206949 |

|        |                                                               |      |                     |
|--------|---------------------------------------------------------------|------|---------------------|
| 550392 | mitogen activated protein kinase 3                            | 1.59 | Mm.8385             |
| 717886 |                                                               | 1.59 |                     |
| 849743 | short coiled-coil protein                                     | 1.59 | Mm.219245           |
| 761990 |                                                               | 1.59 |                     |
| 443623 | dynactin 4                                                    | 1.59 | Mm.272801           |
| 811111 |                                                               | 1.59 |                     |
| 376548 | phosphofurin acidic cluster sorting protein 1                 | 1.59 | Mm.234923           |
| 481074 | COMM domain containing 10                                     | 1.59 | Mm.210734           |
| 892957 | bladder cancer associated protein homolog (human)             | 1.59 | Mm.34330            |
| 901162 |                                                               | 1.59 | Mm.322491           |
| 511033 | calcium regulated heat stable protein 1                       | 1.59 | Mm.142095           |
| 537829 | protein phosphatase 2 regulatory subunit B (B56) beta isoform | 1.59 | Mm.118076           |
| 363511 | small EDRK-rich factor 2                                      | 1.59 | Mm.317642           |
| 584010 | RIKEN cDNA 0710008K08 gene                                    | 1.59 | Mm.64911            |
| 636303 | RIKEN cDNA C730048E16 gene                                    | 1.59 | Mm.24262            |
| 605815 | CDW92 antigen                                                 | 1.59 | Mm.270088           |
| 363825 | Lutheran blood group (Auberger b antigen included)            | 1.59 | Mm.358681           |
| 349481 |                                                               | 1.60 |                     |
| 911160 | DnaJ (Hsp40) homolog subfamily A member 2                     | 1.60 | Mm.279692           |
| 863829 |                                                               | 1.60 |                     |
| 896114 |                                                               | 1.60 |                     |
| 845018 | activator of basal transcription                              | 1.60 | Mm.292094           |
| 651910 | replication factor C 1                                        | 1.60 | Mm.148877           |
| 828543 | methyl-CpG binding domain protein 1                           | 1.60 | Mm.22522            |
| 916448 | deoxyuridine triphosphatase                                   | 1.60 | Mm.282499           |
| 849749 | RIKEN cDNA 9030607L17 gene                                    | 1.60 | Mm.35802            |
| 544864 | apolipoprotein D                                              | 1.60 | Mm.2082             |
| 872448 | cryptochrome 1 (photolyase-like)                              | 1.60 | Mm.26237            |
| 922521 | RIKEN cDNA 1110056N09 gene                                    | 1.60 | Mm.238034           |
| 896231 |                                                               | 1.60 | Mm.291750;Mm.140568 |
| 932903 | ATPase H <sup>+</sup> transporting V1 subunit D               | 1.60 | Mm.311549           |
| 931424 | RIKEN cDNA 1300002C08 gene                                    | 1.60 | Mm.45125            |
| 318098 |                                                               | 1.60 |                     |
| 481994 |                                                               | 1.60 |                     |
| 563662 | staufer (RNA binding protein) homolog 2 (Drosophila)          | 1.60 | Mm.216257           |
| 899178 |                                                               | 1.61 | Mm.322491           |
| 553028 | histidyl-tRNA synthetase-like                                 | 1.61 | Mm.282700           |

|        |                                                                                                              |      |           |
|--------|--------------------------------------------------------------------------------------------------------------|------|-----------|
| 381063 | zinc finger protein 641                                                                                      | 1.61 | Mm.207453 |
| 932509 | RIKEN cDNA A930011F22 gene                                                                                   | 1.61 | Mm.29681  |
| 404560 |                                                                                                              | 1.61 |           |
| 899036 |                                                                                                              | 1.61 |           |
| 330489 |                                                                                                              | 1.61 |           |
| 573670 | trichorhinophalangeal syndrome I (human)                                                                     | 1.61 | Mm.30466  |
| 388586 | kelch-like 5 (Drosophila)                                                                                    | 1.61 | Mm.10281  |
| 895998 |                                                                                                              | 1.61 |           |
| 486901 |                                                                                                              | 1.61 | Mm.274995 |
| 405203 | rod outer segment membrane protein 1                                                                         | 1.61 | Mm.347492 |
| 336681 | tudor domain containing 7                                                                                    | 1.61 | Mm.275413 |
| 440327 | CHMP family member 7                                                                                         | 1.61 | Mm.159637 |
| 798461 |                                                                                                              | 1.61 |           |
| 437935 | nuclear antigen Sp100                                                                                        | 1.62 | Mm.290906 |
| 437575 |                                                                                                              | 1.62 | Mm.347478 |
| 896315 | ring-box 1                                                                                                   | 1.62 | Mm.29405  |
| 526944 | methionine adenosyltransferase II alpha                                                                      | 1.62 | Mm.29815  |
| 688520 | dimethylarginine dimethylaminohydrolase 1                                                                    | 1.62 | Mm.234247 |
| 900851 |                                                                                                              | 1.62 |           |
| 599844 | expressed sequence C77604                                                                                    | 1.62 | Mm.277413 |
| 499158 | endothelin converting enzyme-like 1                                                                          | 1.62 | Mm.140765 |
| 927015 | RIKEN cDNA 0610040B21 gene                                                                                   | 1.62 | Mm.159965 |
| 300400 |                                                                                                              | 1.62 |           |
| 804474 |                                                                                                              | 1.62 |           |
| 906552 |                                                                                                              | 1.62 |           |
| 856341 | pterin 4 alpha carbinolamine dehydratase/dimerization cofactor of hepatocyte nuclear factor 1 alpha (TCF1) 2 | 1.62 | Mm.28145  |
| 741537 | histocompatibility 2 K1 K region                                                                             | 1.62 | Mm.16771  |
| 681425 | stimulated by retinoic acid 13                                                                               | 1.62 | Mm.259716 |
| 861222 | RIKEN cDNA A330104H05 gene                                                                                   | 1.62 | Mm.91712  |
| 505384 |                                                                                                              | 1.62 |           |
| 713690 | RIKEN cDNA 2610524H06 gene                                                                                   | 1.62 | Mm.359018 |
| 653007 |                                                                                                              | 1.62 |           |
| 931578 | DNA Segment Chr 15 Mouse Genome Informatics 27                                                               | 1.62 | Mm.287740 |
| 907884 |                                                                                                              | 1.62 |           |
| 592112 | granulin                                                                                                     | 1.62 | Mm.1568   |
| 923867 | lectin galactose binding soluble 12                                                                          | 1.62 | Mm.298242 |
| 922710 | ring finger protein 2                                                                                        | 1.62 | Mm.31512  |

|        |                                                                  |      |           |
|--------|------------------------------------------------------------------|------|-----------|
| 911303 | RIKEN cDNA 2700049A03 gene                                       | 1.62 |           |
| 898183 |                                                                  | 1.62 |           |
| 799136 | signal recognition particle receptor ('docking protein')         | 1.62 | Mm.284688 |
| 730247 | transforming growth factor beta receptor I                       | 1.63 | Mm.197552 |
| 899809 | similar to tumor protein translationally-controlled 1            | 1.63 |           |
| 903111 |                                                                  | 1.63 | Mm.261679 |
| 904753 | coiled-coil domain containing 2                                  | 1.63 | Mm.240619 |
| 901980 | spermidine synthase                                              | 1.63 | Mm.10     |
| 788379 | dihydrolipoamide dehydrogenase                                   | 1.63 | Mm.3131   |
| 501289 | presenilin 1                                                     | 1.63 | Mm.998    |
| 918603 | open reading frame 19                                            | 1.63 |           |
| 358762 | B-cell CLL/lymphoma 6 member B                                   | 1.63 | Mm.12930  |
| 415222 | NADH dehydrogenase (ubiquinone) 1 alpha subcomplex 9             | 1.63 | Mm.29939  |
| 452876 |                                                                  | 1.63 | Mm.257354 |
| 437853 |                                                                  | 1.63 |           |
| 682452 |                                                                  | 1.63 |           |
| 438361 |                                                                  | 1.63 |           |
| 802203 | RIKEN cDNA 6720458F09 gene                                       | 1.63 | Mm.38041  |
| 598879 | RIKEN cDNA 5730478M09 gene                                       | 1.63 |           |
| 506539 | DNA segment Chr 6 Brigham & Women's Genetics 1452 expressed      | 1.63 |           |
| 419892 | dual-specificity tyrosine-(Y)-phosphorylation regulated kinase 3 | 1.63 | Mm.39299  |
| 561884 | serine/threonine kinase 11 interacting protein                   | 1.63 | Mm.312650 |
| 929595 | 5'-3' exoribonuclease 2                                          | 1.63 | Mm.3065   |
| 896960 |                                                                  | 1.63 |           |
| 626920 | secreted acidic cysteine rich glycoprotein                       | 1.64 | Mm.291442 |
| 479998 | EH-domain containing 3                                           | 1.64 | Mm.18526  |
| 726053 | spindlin                                                         | 1.64 | Mm.188432 |
| 913871 | tetraspanin 9                                                    | 1.64 | Mm.21814  |
| 305822 | sphingosine-1-phosphate phosphatase 2                            | 1.64 | Mm.276248 |
| 340019 | Sin3-associated polypeptide 18                                   | 1.64 | Mm.344671 |
| 527052 | DNA segment Chr 11 KL Mohlke 35                                  | 1.64 | Mm.38802  |
| 536894 |                                                                  | 1.64 |           |
| 468161 | eukaryotic translation initiation factor 2B subunit 4 delta      | 1.64 | Mm.29394  |
| 586218 | tumor suppressor candidate 2                                     | 1.64 | Mm.21739  |
| 650993 | ADP-ribosylation factor-like 10C                                 | 1.64 | Mm.271178 |
| 717303 | cDNA sequence BC002216                                           | 1.64 | Mm.25556  |

|        |                                                                            |      |           |
|--------|----------------------------------------------------------------------------|------|-----------|
| 536618 | leucine zipper domain protein                                              | 1.64 | Mm.27792  |
| 701260 | protein phosphatase 1 regulatory (inhibitor) subunit 3F                    | 1.64 | Mm.148163 |
| 610774 | expressed sequence AI842788                                                | 1.64 | Mm.329657 |
| 401046 | cDNA sequence BC024969                                                     | 1.64 |           |
| 895978 |                                                                            | 1.64 | Mm.757    |
| 714620 | RIKEN cDNA C330023F11 gene                                                 | 1.65 | Mm.136458 |
| 896020 |                                                                            | 1.65 | Mm.199698 |
| 796975 | gene model 693 (NCBI)                                                      | 1.65 |           |
| 893483 | acid phosphatase 1 soluble                                                 | 1.65 | Mm.359831 |
| 915343 | cell death-inducing DNA fragmentation factor alpha subunit-like effector B | 1.65 | Mm.10737  |
| 318627 | RIKEN cDNA C630023L15 gene                                                 | 1.65 | Mm.40588  |
| 902724 |                                                                            | 1.65 |           |
| 739728 | tetraspanin 7                                                              | 1.65 | Mm.18590  |
| 321422 |                                                                            | 1.65 | Mm.196472 |
| 744136 | succinate dehydrogenase complex subunit A flavoprotein (Fp)                | 1.65 | Mm.158231 |
| 594153 | RIKEN cDNA 9230112D13 gene                                                 | 1.65 |           |
| 545031 | RIKEN cDNA 1810073G14 gene                                                 | 1.65 | Mm.25632  |
| 645401 | RIKEN cDNA 2510048L02 gene                                                 | 1.65 | Mm.154305 |
| 895273 |                                                                            | 1.65 | Mm.24805  |
| 815117 |                                                                            | 1.65 |           |
| 914052 | RIKEN cDNA 1200006O19 gene                                                 | 1.66 | Mm.54126  |
| 738187 | p21 (CDKN1A)-activated kinase 7                                            | 1.66 | Mm.131572 |
| 316945 | RIKEN cDNA A730041O15 gene                                                 | 1.66 | Mm.308396 |
| 552612 | pyruvate dehydrogenase E1 alpha 1                                          | 1.66 | Mm.34775  |
| 607889 | RIKEN cDNA 4733401H18 gene                                                 | 1.66 | Mm.29471  |
| 325779 |                                                                            | 1.66 |           |
| 894232 |                                                                            | 1.66 |           |
| 349909 | MAP/microtubule affinity-regulating kinase 3                               | 1.66 | Mm.28678  |
| 761065 | natural killer tumor recognition sequence                                  | 1.67 | Mm.32842  |
| 732153 | protein tyrosine phosphatase receptor type E                               | 1.67 | Mm.945    |
| 376652 |                                                                            | 1.67 |           |
| 465245 | RIKEN cDNA 1500019G21 gene                                                 | 1.67 | Mm.6803   |
| 503448 |                                                                            | 1.67 |           |
| 420857 | similar to Ac2-210                                                         | 1.67 |           |
| 334779 | Fas apoptotic inhibitory molecule 2                                        | 1.67 | Mm.39760  |
| 488567 |                                                                            | 1.67 |           |
| 855413 |                                                                            | 1.67 |           |

|        |                                                                       |      |                                         |
|--------|-----------------------------------------------------------------------|------|-----------------------------------------|
| 361527 | RIKEN cDNA 1810013D10 gene                                            | 1.67 |                                         |
| 335445 | procollagen type IV alpha 1                                           | 1.67 | Mm.738                                  |
| 329996 | mediator of RNA polymerase II transcription subunit 6 homolog (yeast) | 1.67 | Mm.279993                               |
| 914911 | quaking                                                               | 1.67 | Mm.262294                               |
| 495606 | Eph receptor B2                                                       | 1.67 | Mm.250981                               |
| 916274 | actin alpha 1 skeletal muscle                                         | 1.67 | Mm.214950                               |
| 631907 | contactin associated protein-like 2                                   | 1.68 | Mm.320994                               |
| 398003 | phosphofructokinase muscle                                            | 1.68 | Mm.272582                               |
| 498250 | 5'-3' exoribonuclease 1                                               | 1.68 | Mm.291179                               |
| 425404 | RIKEN cDNA D330012F22 gene                                            | 1.68 | Mm.187733                               |
| 322115 |                                                                       | 1.68 |                                         |
| 685967 | RIKEN cDNA 1110059F07 gene                                            | 1.68 | Mm.331142                               |
| 869360 | sphingomyelin phosphodiesterase 1 acid lysosomal                      | 1.68 | Mm.4628                                 |
| 776278 |                                                                       | 1.68 |                                         |
| 440209 | aspartyl-tRNA synthetase                                              | 1.69 | Mm.28693                                |
| 593393 | RIKEN cDNA 4933406E20 gene                                            | 1.69 | Mm.226534                               |
| 374617 | lysozyme                                                              | 1.69 | Mm.45436                                |
| 755727 | surfeit gene 1                                                        | 1.69 | Mm.347512                               |
| 638465 |                                                                       | 1.69 | Mm.358826;Mm.290597;Mm.342918;Mm.190795 |
| 861450 |                                                                       | 1.69 | Mm.358826;Mm.290597;Mm.342918;Mm.190795 |
| 630457 | mesoderm development candidate 1                                      | 1.69 | Mm.272998                               |
| 800513 | U1 small nuclear ribonucleoprotein polypeptide A                      | 1.69 | Mm.216386                               |
| 475705 | RIKEN cDNA 2310045A20 gene                                            | 1.69 | Mm.235020                               |
| 896617 |                                                                       | 1.69 |                                         |
| 342552 | RIKEN cDNA 1110030L07 gene                                            | 1.69 | Mm.290725                               |
| 443100 | gene model 1027 (NCBI)                                                | 1.69 |                                         |
| 716038 | forkhead box K1                                                       | 1.69 | Mm.78250                                |
| 593829 |                                                                       | 1.69 |                                         |
| 558829 |                                                                       | 1.70 |                                         |
| 655753 | polymerase (RNA) II (DNA directed) polypeptide J                      | 1.70 | Mm.4896                                 |
| 924477 | RIKEN cDNA 3830422K02 gene                                            | 1.70 | Mm.83037                                |
| 325918 | mannose-P-dolichol utilization defect 1                               | 1.70 | Mm.89579                                |
| 903688 | eukaryotic translation initiation factor 4A1                          | 1.70 | Mm.371557                               |
| 586446 | solute carrier organic anion transporter family member 1a4            | 1.70 | Mm.255586                               |

|        |                                                                       |      |                     |
|--------|-----------------------------------------------------------------------|------|---------------------|
| 427993 | solute carrier family 29 (nucleoside transporters) member 4           | 1.70 | Mm.125942           |
| 923933 | SAC3 domain containing 1                                              | 1.70 | Mm.303924           |
| 744356 | pleckstrin homology domain containing family B (evectins) member 1    | 1.70 | Mm.26633            |
| 619979 | RAB28 member RAS oncogene family                                      | 1.70 | Mm.41555            |
| 834065 | protease (prosome macropain) 26S subunit ATPase 5                     | 1.70 | Mm.272361           |
| 836725 |                                                                       | 1.70 |                     |
| 669461 |                                                                       | 1.70 | Mm.305750           |
| 892030 | tropomyosin 4                                                         | 1.70 | Mm.295124           |
| 824892 |                                                                       | 1.70 |                     |
| 799893 |                                                                       | 1.70 |                     |
| 458119 | phospholipase C-like 2                                                | 1.70 | Mm.217362           |
| 932088 | RIKEN cDNA 2810021O14 gene                                            | 1.71 | Mm.256185           |
| 480978 | calsequestrin 2                                                       | 1.71 | Mm.15343            |
| 480056 |                                                                       | 1.71 |                     |
| 528992 | cat eye syndrome chromosome region candidate 5 homolog (human)        | 1.71 | Mm.255322           |
| 311394 | RUN and TBC1 domain containing 3                                      | 1.71 | Mm.274943           |
| 613647 | CAP adenylate cyclase-associated protein 1 (yeast)                    | 1.71 | Mm.8687             |
| 551844 |                                                                       | 1.71 |                     |
| 563177 |                                                                       | 1.71 | Mm.38249            |
| 603345 | GRIP1 associated protein 1                                            | 1.71 | Mm.194811           |
| 729611 | staufer (RNA binding protein) homolog 1 (Drosophila)                  | 1.71 | Mm.73276            |
| 775070 |                                                                       | 1.71 |                     |
| 552773 |                                                                       | 1.71 |                     |
| 601289 |                                                                       | 1.71 |                     |
| 514617 | protein kinase C substrate 80K-H                                      | 1.71 | Mm.214593           |
| 353265 |                                                                       | 1.71 | Mm.280083           |
| 916253 | selenoprotein W muscle 1                                              | 1.71 | Mm.42829            |
| 864915 | mitogen activated protein kinase kinase 2                             | 1.71 | Mm.275436           |
| 697317 | potassium channel tetramerisation domain containing 17                | 1.71 |                     |
| 892360 |                                                                       | 1.71 | Mm.347699;Mm.342457 |
| 667925 | expressed sequence AI597479                                           | 1.72 | Mm.28817            |
| 917205 | ubiquitin-like 5                                                      | 1.72 | Mm.370232           |
| 455596 |                                                                       | 1.72 |                     |
| 912108 | cerebral cavernous malformations 1                                    | 1.72 | Mm.32368            |
| 898644 | similar to suppressor of initiator codon mutations related sequence 1 | 1.72 |                     |

|        |                                                                                                                       |      |           |
|--------|-----------------------------------------------------------------------------------------------------------------------|------|-----------|
| 315586 | RIKEN cDNA C330023M02 gene                                                                                            | 1.72 | Mm.33919  |
| 424476 |                                                                                                                       | 1.72 |           |
| 892253 | myeloid ecotropic viral integration site-related gene 2                                                               | 1.72 | Mm.360516 |
| 870208 | RIKEN cDNA 2410004N11 gene                                                                                            | 1.72 | Mm.435    |
| 454989 | EF hand domain containing 1                                                                                           | 1.72 | Mm.247951 |
| 347191 | RAB27b member RAS oncogene family                                                                                     | 1.72 | Mm.246753 |
| 905380 | vacuolar protein sorting 35                                                                                           | 1.72 | Mm.296520 |
| 844982 | HRAS like suppressor 3                                                                                                | 1.72 | Mm.274810 |
| 690372 |                                                                                                                       | 1.72 |           |
| 503038 |                                                                                                                       | 1.72 |           |
| 751990 |                                                                                                                       | 1.73 |           |
| 913372 | RIKEN cDNA 2410005K17 gene                                                                                            | 1.73 | Mm.36697  |
| 617353 | poly (ADP-ribose) polymerase family member 2                                                                          | 1.73 | Mm.281482 |
| 596044 | fatty acid synthase                                                                                                   | 1.73 | Mm.236443 |
| 535238 |                                                                                                                       | 1.73 |           |
| 692121 | dynein cytoplasmic heavy chain 1                                                                                      | 1.73 | Mm.181430 |
| 729770 |                                                                                                                       | 1.73 |           |
| 341754 | RIKEN cDNA 2810439M11 gene                                                                                            | 1.73 | Mm.358749 |
| 894157 | RIKEN cDNA 2600013N14 gene                                                                                            | 1.73 | Mm.35492  |
| 380387 | pleckstrin homology domain containing family F (with FYVE domain) member 1                                            | 1.73 | Mm.333798 |
| 298558 | GTPase activating protein and VPS9 domains 1                                                                          | 1.73 | Mm.156452 |
| 896385 | ornithine decarboxylase antizyme 2                                                                                    | 1.74 | Mm.116749 |
| 907987 | acylphosphatase 1 erythrocyte (common) type                                                                           | 1.74 | Mm.311985 |
| 900726 | ATP synthase H <sup>+</sup> transporting mitochondrial F0 complex subunit F membrane-associated ring finger (C3HC4) 8 | 1.74 | Mm.353    |
| 608868 |                                                                                                                       | 1.74 | Mm.27064  |
| 654873 | inositol 1 3 4-triphosphate 5/6 kinase                                                                                | 1.74 | Mm.347546 |
| 698774 | WD repeat domain 6                                                                                                    | 1.74 | Mm.335454 |
| 417734 |                                                                                                                       | 1.74 |           |
| 706371 |                                                                                                                       | 1.74 | Mm.358996 |
| 900401 | cytochrome c somatic                                                                                                  | 1.74 | Mm.35389  |
| 902439 | similar to Rps15a protein                                                                                             | 1.74 |           |
| 910777 | serine/threonine kinase 16                                                                                            | 1.74 | Mm.17461  |
| 486965 | cell division cycle 42 homolog (S. cerevisiae)                                                                        | 1.75 | Mm.1022   |
| 816056 | metal response element binding transcription factor 1                                                                 | 1.75 | Mm.272397 |
| 436768 | AKT1 substrate 1 (proline-rich)                                                                                       | 1.75 | Mm.148007 |



|        |                                                                                 |      |                    |
|--------|---------------------------------------------------------------------------------|------|--------------------|
| 583439 | RIKEN cDNA 0610039A15 gene                                                      | 1.75 | Mm.275989          |
| 907414 | RIKEN cDNA 1810027O10 gene                                                      | 1.75 |                    |
| 902257 |                                                                                 | 1.75 |                    |
| 648382 | zinc finger protein 655                                                         | 1.75 | Mm.206555          |
| 895230 |                                                                                 | 1.75 | Mm.337074          |
| 474099 | DNA methyltransferase 1-associated protein 1                                    | 1.75 | Mm.29142           |
| 456571 | thyroid hormone receptor interactor 3                                           | 1.75 | Mm.288689          |
| 907049 | kelch-like 20 (Drosophila)                                                      | 1.75 | Mm.255165          |
| 892320 | RIKEN cDNA 1110033J19 gene                                                      | 1.75 | Mm.3572            |
| 340546 |                                                                                 | 1.75 |                    |
| 406109 |                                                                                 | 1.75 | Mm.338723;Mm.39910 |
| 531010 |                                                                                 | 1.76 |                    |
| 492807 | cAMP responsive element binding protein 3                                       | 1.76 | Mm.12407           |
| 519118 |                                                                                 | 1.76 |                    |
| 557486 | ubiquitin-conjugating enzyme E2G 2                                              | 1.76 | Mm.307906          |
| 634272 | pelota homolog (Drosophila)                                                     | 1.76 | Mm.317280          |
| 451724 | calsyntenin 3                                                                   | 1.76 | Mm.193701          |
| 656797 |                                                                                 | 1.76 |                    |
| 367615 |                                                                                 | 1.76 |                    |
| 596226 | eukaryotic translation initiation factor 5                                      | 1.76 | Mm.271222          |
| 838322 | expressed sequence AW548124                                                     | 1.76 | Mm.311974          |
| 755201 | ring finger protein 14                                                          | 1.76 | Mm.228903          |
| 529916 |                                                                                 | 1.76 |                    |
| 606287 | 3-monooxygenase/tryptophan 5-monooxygenase activation protein gamma polypeptide | 1.76 | Mm.233813          |
| 645698 | Slit-like 2 (Drosophila)                                                        | 1.76 | Mm.248337          |
| 743740 | RIKEN cDNA A730011L01 gene                                                      | 1.76 | Mm.271946          |
| 581321 | stathmin-like 4                                                                 | 1.77 | Mm.35474           |
| 894331 |                                                                                 | 1.77 |                    |
| 632461 | poly(rC) binding protein 3                                                      | 1.77 | Mm.272803          |
| 421110 | cDNA sequence BC026996                                                          | 1.77 | Mm.30571           |
| 674609 |                                                                                 | 1.77 |                    |
| 492007 | Wolfram syndrome 1 homolog (human)                                              | 1.77 | Mm.20916           |
| 400524 |                                                                                 | 1.77 |                    |
| 453235 | chromosome condensation 1-like                                                  | 1.77 | Mm.280068          |
| 392453 | RIKEN cDNA 2310044H10 gene                                                      | 1.77 | Mm.294759          |
| 842114 | L-3-hydroxyacyl-Coenzyme A dehydrogenase short chain                            | 1.77 | Mm.260164          |
| 785886 | cytoplasmic polyadenylation element binding protein 2                           | 1.77 | Mm.7233            |

|        |                                                                                                   |      |           |
|--------|---------------------------------------------------------------------------------------------------|------|-----------|
| 904378 | quininoid dihydropteridine reductase                                                              | 1.77 | Mm.30204  |
| 908702 | DnaJ (Hsp40) homolog subfamily C member 14                                                        | 1.77 | Mm.296915 |
| 395141 | ATPase Ca <sup>++</sup> transporting plasma membrane 1                                            | 1.77 |           |
| 600352 | RIKEN cDNA C230009H10 gene                                                                        | 1.77 | Mm.347730 |
| 452037 | RIKEN cDNA 1190002N15 gene                                                                        | 1.77 |           |
| 872360 | cyclin-dependent kinase 5 regulatory subunit (p35) 1                                              | 1.77 | Mm.142275 |
| 770388 | RIKEN cDNA 1810060J02 gene                                                                        | 1.77 | Mm.209774 |
| 830661 | guanine nucleotide binding protein (G protein) gamma 4 subunit                                    | 1.77 | Mm.215394 |
| 901375 |                                                                                                   | 1.77 | Mm.313236 |
| 912613 | peroxiredoxin 5                                                                                   | 1.78 | Mm.279782 |
| 700442 | mitochondrial ribosomal protein L44                                                               | 1.78 |           |
| 453814 | DNA segment Chr 15 Wayne State University 75 expressed                                            | 1.78 | Mm.373551 |
| 470920 | solute carrier family 9 (sodium/hydrogen exchanger) isoform 6                                     | 1.78 | Mm.17815  |
| 540859 | ATP synthase H <sup>+</sup> transporting mitochondrial F0 complex subunit c (subunit 9) isoform 3 | 1.78 | Mm.2966   |
| 897096 |                                                                                                   | 1.78 |           |
| 922636 | protein phosphatase 1 regulatory (inhibitor) subunit 1B                                           | 1.78 | Mm.45372  |
| 804789 |                                                                                                   | 1.78 |           |
| 642885 | tripartite motif protein 37                                                                       | 1.78 | Mm.17436  |
| 506452 | prickle like 1 (Drosophila)                                                                       | 1.78 |           |
| 341223 |                                                                                                   | 1.78 |           |
| 808517 | coatamer protein complex subunit gamma                                                            | 1.78 | Mm.258785 |
| 503614 | RIKEN cDNA 1190017O12 gene                                                                        | 1.79 | Mm.366196 |
| 746713 | importin 9                                                                                        | 1.79 |           |
| 782669 |                                                                                                   | 1.79 |           |
| 529176 | glycine amidinotransferase (L-arginine:glycine amidinotransferase)                                | 1.79 | Mm.29975  |
| 732315 | B-cell translocation gene 2 anti-proliferative                                                    | 1.79 | Mm.239605 |
| 365610 |                                                                                                   | 1.79 |           |
| 928968 | glutamate receptor ionotropic N-methyl D-aspartate-associated protein 1 (glutamate binding)       | 1.79 | Mm.41665  |
| 900157 | high mobility group box 3                                                                         | 1.79 | Mm.336087 |
| 611934 | diazepam binding inhibitor                                                                        | 1.79 | Mm.2785   |
| 400454 | transcription elongation factor A (SII)-like 8                                                    | 1.79 | Mm.182094 |
| 488669 | molybdenum cofactor synthesis 2                                                                   | 1.79 | Mm.19027  |

|        |                                                                                                                             |      |                     |
|--------|-----------------------------------------------------------------------------------------------------------------------------|------|---------------------|
| 489372 | tyrosyl-tRNA synthetase                                                                                                     | 1.79 | Mm.145488           |
| 896997 |                                                                                                                             | 1.80 |                     |
| 445801 | myocilin                                                                                                                    | 1.80 | Mm.10694            |
| 897564 |                                                                                                                             | 1.80 |                     |
| 925126 | trinucleotide repeat containing 5                                                                                           | 1.80 | Mm.240325           |
| 367484 | RAB3B member RAS oncogene family                                                                                            | 1.80 | Mm.41580            |
| 649474 | visinin-like 1                                                                                                              | 1.80 | Mm.27005            |
| 299618 | IQ calmodulin-binding motif containing 1                                                                                    | 1.80 | Mm.222934           |
| 627739 | imprinted and ancient                                                                                                       | 1.80 | Mm.8154             |
| 547326 |                                                                                                                             | 1.80 |                     |
| 860673 |                                                                                                                             | 1.80 |                     |
| 768402 | cDNA sequence BC008155                                                                                                      | 1.81 | Mm.26783            |
| 727933 | acetyl-Coenzyme A acyltransferase 2 (mitochondrial 3-oxoacyl-Coenzyme A thiolase)                                           | 1.81 | Mm.245724           |
| 751684 | AT motif binding factor 1                                                                                                   | 1.81 | Mm.196564           |
| 773713 | RIKEN cDNA 4930429A08 gene                                                                                                  | 1.81 |                     |
| 899352 | similar to Peptidyl-prolyl cis-trans isomerase A (PPIase) (Rotamase) (Cyclophilin A) (Cyclosporin A-binding protein) (SP18) | 1.81 |                     |
| 865745 |                                                                                                                             | 1.81 |                     |
| 306600 | histone cell cycle regulation defective interacting protein 5                                                               | 1.81 | Mm.23809            |
| 566676 | RIKEN cDNA 4930417P05 gene                                                                                                  | 1.81 |                     |
| 576001 | RIKEN cDNA 4933402L21 gene                                                                                                  | 1.81 |                     |
| 445455 | DNA segment Chr 3 University of California at Los Angeles 1                                                                 | 1.81 | Mm.29702            |
| 673348 |                                                                                                                             | 1.81 |                     |
| 771795 | solute carrier organic anion transporter family member 1c1                                                                  | 1.81 | Mm.284495           |
| 521574 | UDP-N-acetyl-alpha-D-galactosamine:polypeptide N-acetylgalactosaminyltransferase-like 1                                     | 1.81 |                     |
| 851885 |                                                                                                                             | 1.81 | Mm.246550;Mm.291811 |
| 632639 |                                                                                                                             | 1.82 |                     |
| 841577 |                                                                                                                             | 1.82 |                     |
| 544854 | DEAD (Asp-Glu-Ala-Asp) box polypeptide 1                                                                                    | 1.82 | Mm.251255           |
| 644189 | RIKEN cDNA 1810058I14 gene                                                                                                  | 1.82 |                     |
| 833165 | nuclear receptor coactivator 4                                                                                              | 1.82 | Mm.371598           |
| 828999 | RIKEN cDNA 1110034C04 gene                                                                                                  | 1.82 | Mm.87077            |
| 489722 | O-linked N-acetylglucosamine (GlcNAc) transferase (UDP-N-acetylglucosamine:polypeptide-N-                                   | 1.82 | Mm.259191           |

|        |                                                                 |      |           |
|--------|-----------------------------------------------------------------|------|-----------|
|        | acetylglucosaminyl transferase)                                 |      |           |
| 531607 |                                                                 | 1.82 |           |
| 356814 | RIKEN cDNA 2210012G02 gene                                      | 1.82 | Mm.347940 |
| 767264 |                                                                 | 1.82 |           |
| 747903 | DNA methyltransferase 2                                         | 1.82 | Mm.6979   |
| 413216 | zinc finger protein 99                                          | 1.82 | Mm.26782  |
| 814480 | ankyrin repeat domain 27 (VPS9 domain)                          | 1.82 | Mm.272620 |
| 532546 |                                                                 | 1.82 |           |
| 363983 |                                                                 | 1.83 |           |
| 491495 | RIKEN cDNA 4933440H19 gene                                      | 1.83 | Mm.102341 |
| 919483 | cyclic nucleotide phosphodiesterase 1                           | 1.83 | Mm.15711  |
| 345950 | CDC91 cell division cycle 91-like 1 (S. cerevisiae)             | 1.83 | Mm.5434   |
| 681607 | ets variant gene 4 (E1A enhancer binding protein E1AF)          | 1.83 | Mm.5025   |
| 634118 | myocyte enhancer factor 2C                                      | 1.83 | Mm.24001  |
| 328460 | nucleolar and coiled-body phosphoprotein 1                      | 1.83 | Mm.78861  |
| 881505 |                                                                 | 1.83 |           |
| 913314 | recombining binding protein suppressor of hairless (Drosophila) | 1.83 | Mm.209292 |
| 862922 | RIKEN cDNA 2510049I19 gene                                      | 1.83 | Mm.28327  |
| 900739 |                                                                 | 1.83 | Mm.290816 |
| 310662 |                                                                 | 1.83 |           |
| 570283 | mindbomb homolog 2 (Drosophila)                                 | 1.83 | Mm.235738 |
| 850650 | RIKEN cDNA 2210404D11 gene                                      | 1.83 | Mm.194459 |
| 924687 | RGM domain family member A                                      | 1.83 | Mm.333943 |
| 898407 | RIKEN cDNA 1810014L12 gene                                      | 1.84 | Mm.29431  |
| 686778 | carbohydrate sulfotransferase 12                                | 1.84 | Mm.28934  |
| 910378 | fucosyltransferase 8                                            | 1.84 | Mm.35628  |
| 387395 | transmembrane protein 49                                        | 1.84 | Mm.243797 |
| 842560 | RIKEN cDNA 2610019P18 gene                                      | 1.84 | Mm.24592  |
| 476162 | calnexin                                                        | 1.84 | Mm.248827 |
| 495959 | lens intrinsic membrane protein 2                               | 1.84 | Mm.267027 |
| 681519 |                                                                 | 1.84 |           |
| 901291 | upstream binding protein 1                                      | 1.84 | Mm.28052  |
| 835887 | SEC15-like 2 (S. cerevisiae)                                    | 1.84 |           |
| 929684 |                                                                 | 1.85 |           |
| 298593 | outer dense fiber of sperm tails 2                              | 1.85 | Mm.330116 |
| 603516 | ankyrin repeat domain 28                                        | 1.85 |           |
| 896171 | hypothetical LOC494468                                          | 1.85 | Mm.271980 |
| 588178 | chaperone ABC1 activity of bc1 complex like (S. pombe)          | 1.85 | Mm.38330  |

|        |                                                                                                  |      |           |
|--------|--------------------------------------------------------------------------------------------------|------|-----------|
| 384831 | PHD finger protein 3                                                                             | 1.85 |           |
| 401807 | RIKEN cDNA 4921506I22 gene                                                                       | 1.85 | Mm.329666 |
| 387871 |                                                                                                  | 1.85 |           |
| 493760 |                                                                                                  | 1.85 |           |
| 402782 | RIKEN cDNA 2310022B05 gene                                                                       | 1.85 | Mm.261920 |
| 685442 |                                                                                                  | 1.85 |           |
| 768540 |                                                                                                  | 1.85 |           |
| 506455 |                                                                                                  | 1.85 |           |
| 630664 | mannosidase alpha class 1C member 1                                                              | 1.86 | Mm.18905  |
| 366015 | platelet-activating factor acetylhydrolase isoform 1b alpha2 subunit                             | 1.86 | Mm.373536 |
| 674865 | RIKEN cDNA 9530058B02 gene                                                                       | 1.86 | Mm.328870 |
| 635710 | RIKEN cDNA 2810022L02 gene                                                                       | 1.86 | Mm.159989 |
| 875407 | RIKEN cDNA 6720463E02 gene                                                                       | 1.86 | Mm.246436 |
| 891930 | H2A histone family member Z                                                                      | 1.86 | Mm.117541 |
| 302772 | diphtheria toxin resistance protein required for diphthamide biosynthesis (Saccharomyces)-like 2 | 1.86 | Mm.13823  |
| 860643 | RIKEN cDNA 9130213B05 gene                                                                       | 1.86 | Mm.5002   |
| 431335 | lysophosphatidylglycerol acyltransferase 1                                                       | 1.86 | Mm.277958 |
| 361480 | RIKEN cDNA 1810008K03 gene                                                                       | 1.86 | Mm.35083  |
| 634229 | antizyme inhibitor 1                                                                             | 1.86 | Mm.250214 |
| 704125 | zinc finger CW-type with coiled-coil domain 3                                                    | 1.86 |           |
| 422109 |                                                                                                  | 1.87 | Mm.32019  |
| 438675 | DNA segment Chr 4 Brigham & Women's Genetics 0951 expressed                                      | 1.87 | Mm.273986 |
| 925384 | interferon regulatory factor 3                                                                   | 1.87 | Mm.3960   |
| 312780 | cadherin 20                                                                                      | 1.87 | Mm.103640 |
| 923748 | olfactomedin 3                                                                                   | 1.87 | Mm.54183  |
| 482123 |                                                                                                  | 1.87 |           |
| 828031 | SEC22 vesicle trafficking protein-like 2 (S. cerevisiae)                                         | 1.87 | Mm.259164 |
| 577878 | BTB and CNC homology 2                                                                           | 1.87 | Mm.270304 |
| 685339 | basic leucine zipper and W2 domains 1                                                            | 1.88 | Mm.261831 |
| 531811 | UDP-N-acetyl-alpha-D-galactosamine:polypeptide N-acetylgalactosaminyltransferase 13              | 1.88 | Mm.330227 |
| 866130 | RIKEN cDNA A730017C20 gene                                                                       | 1.88 | Mm.209711 |
| 306082 |                                                                                                  | 1.88 |           |
| 617311 | hyperpolarization-activated cyclic nucleotide-gated K+ 3                                         | 1.88 | Mm.12901  |
| 632882 |                                                                                                  | 1.88 | Mm.229100 |

|        |                                                                                            |      |                         |
|--------|--------------------------------------------------------------------------------------------|------|-------------------------|
| 592982 |                                                                                            | 1.88 |                         |
| 925356 | testis expressed gene 264                                                                  | 1.88 | Mm.22266                |
| 527389 |                                                                                            | 1.88 |                         |
| 572565 | similar to hypothetical protein<br>FLJ90396                                                | 1.88 |                         |
| 436262 | RIKEN cDNA 1110031I02 gene                                                                 | 1.88 | Mm.220890               |
| 688078 | RIKEN cDNA 3110005G23 gene                                                                 | 1.89 | Mm.294445               |
| 917268 | deleted in polyposis 1                                                                     | 1.89 | Mm.280075               |
| 733769 | ras homolog gene family member E                                                           | 1.89 | Mm.46497                |
| 876577 |                                                                                            | 1.89 |                         |
| 913567 | Nedd4 family interacting protein 1                                                         | 1.89 |                         |
| 923354 | RIKEN cDNA 1110038D17 gene                                                                 | 1.89 |                         |
| 841863 | cortexin                                                                                   | 1.89 | Mm.34210                |
| 457339 |                                                                                            | 1.89 |                         |
| 645280 | ADP-ribosylation factor-like 13                                                            | 1.90 |                         |
| 338333 | claudin 11                                                                                 | 1.90 | Mm.4425                 |
| 595676 | far upstream element (FUSE) binding<br>protein 1                                           | 1.90 | Mm.278922               |
| 742757 | cullin 7                                                                                   | 1.90 | Mm.329078               |
| 552021 |                                                                                            | 1.90 | Mm.358972               |
| 407429 | craniofacial development protein 1                                                         | 1.90 | Mm.279437               |
| 896609 |                                                                                            | 1.91 |                         |
| 819122 | nuclear DNA binding protein                                                                | 1.91 | Mm.287982               |
| 868502 | RIKEN cDNA 5730410I19 gene                                                                 | 1.91 | Mm.34261                |
| 508390 | RIKEN cDNA C030002E08 gene                                                                 | 1.91 |                         |
| 562750 |                                                                                            | 1.91 | Mm.208736;Mm.3276<br>49 |
| 665569 |                                                                                            | 1.92 |                         |
| 421078 | paired-like homeobox 2b                                                                    | 1.92 | Mm.62505                |
| 502469 |                                                                                            | 1.92 | Mm.132868               |
| 875639 | chimerin (chimaerin) 1                                                                     | 1.92 | Mm.257073               |
| 359418 | vasoactive intestinal polypeptide<br>capping protein (actin filament)                      | 1.92 | Mm.98916                |
| 726622 | gelsolin-like                                                                              | 1.92 | Mm.18626                |
| 583928 | copine II                                                                                  | 1.92 | Mm.291815               |
| 309908 | prodynorphin                                                                               | 1.93 | Mm.6239                 |
| 769898 | UDP-N-acetyl-alpha-D-<br>galactosamine:polypeptide N-<br>acetylgalactosaminyltransferase 2 | 1.93 | Mm.33808                |
| 900092 |                                                                                            | 1.93 |                         |
| 733034 | RIKEN cDNA 4933407L21 gene                                                                 | 1.93 |                         |
| 831632 | RIKEN cDNA 1500005I02 gene                                                                 | 1.93 | Mm.38347                |
| 850378 | homer homolog 3 (Drosophila)                                                               | 1.93 | Mm.10022                |
| 508557 |                                                                                            | 1.93 | Mm.41715                |

|        |                                                                                        |      |           |
|--------|----------------------------------------------------------------------------------------|------|-----------|
| 894993 | RIKEN cDNA 0610041E09 gene                                                             | 1.94 | Mm.241387 |
| 908953 |                                                                                        | 1.94 |           |
| 458946 | RIKEN cDNA A030009H04 gene                                                             | 1.94 | Mm.5324   |
| 921567 | sperm specific antigen 2                                                               | 1.94 | Mm.272881 |
| 470448 | similar to 60S acidic ribosomal protein P1                                             | 1.94 |           |
| 783823 | RIKEN cDNA 0610007L01 gene                                                             | 1.94 |           |
| 924957 | LSM1 homolog U6 small nuclear RNA associated ( <i>S. cerevisiae</i> )                  | 1.94 |           |
| 912244 | NADH dehydrogenase (ubiquinone) 1 alpha subcomplex 5                                   | 1.95 | Mm.275780 |
| 791114 | transcription factor Dp 1                                                              | 1.95 | Mm.925    |
| 665658 | proline rich membrane anchor 1                                                         | 1.95 | Mm.217019 |
| 759487 | nuclear transport factor 2-like export factor 2                                        | 1.95 | Mm.41899  |
| 900517 |                                                                                        | 1.95 | Mm.3158   |
| 904530 | ATP synthase H <sup>+</sup> transporting mitochondrial F0 complex subunit g            | 1.95 | Mm.14663  |
| 799124 | general transcription factor II H polypeptide 1                                        | 1.95 | Mm.22700  |
| 715669 | chloride channel 3                                                                     | 1.95 | Mm.259751 |
| 430083 | RIKEN cDNA 0610037H22 gene                                                             | 1.95 | Mm.34520  |
| 777972 | expressed sequence AW011752                                                            | 1.95 | Mm.276386 |
| 777355 |                                                                                        | 1.96 |           |
| 775784 | calcium and integrin binding 1 (calmyrin)                                              | 1.96 | Mm.30217  |
| 885152 | zinc finger protein 580                                                                | 1.96 |           |
| 392106 |                                                                                        | 1.97 |           |
| 930035 | tRNA (5-methylaminomethyl-2-thiouridylate)-methyltransferase 1                         | 1.97 | Mm.158211 |
| 896357 |                                                                                        | 1.97 |           |
| 813812 | RIKEN cDNA 8430423A01 gene                                                             | 1.97 | Mm.246869 |
| 403457 | calpain 2                                                                              | 1.97 | Mm.19306  |
| 523258 | CCNDBP1 interactor                                                                     | 1.97 | Mm.29989  |
| 587938 | phosphatase and actin regulator 3                                                      | 1.97 | Mm.44413  |
| 832118 |                                                                                        | 1.97 |           |
| 518424 | Mak3 homolog ( <i>S. cerevisiae</i> )                                                  | 1.97 | Mm.278726 |
| 778366 | acetyl-Coenzyme A carboxylase beta                                                     | 1.97 | Mm.81793  |
| 838923 | proteolipid protein (myelin) 1                                                         | 1.98 | Mm.1268   |
| 865155 |                                                                                        | 1.98 |           |
| 377553 |                                                                                        | 1.98 |           |
| 670935 | RIKEN cDNA 2500001H09 gene                                                             | 1.98 | Mm.288645 |
| 848340 | SRY-box containing gene 2                                                              | 1.98 | Mm.4541   |
| 867517 | COP9 (constitutive photomorphogenic) homolog subunit 8 ( <i>Arabidopsis thaliana</i> ) | 1.98 | Mm.119177 |

|        |                                                                |      |           |
|--------|----------------------------------------------------------------|------|-----------|
| 449392 | signal recognition particle receptor B subunit                 | 1.98 | Mm.273053 |
| 318452 | Rho GTPase activating protein 20                               | 1.98 | Mm.26150  |
| 556731 |                                                                | 1.98 |           |
| 910217 | H2-K region expressed gene 6                                   | 1.99 | Mm.275452 |
| 920445 | centrin 3                                                      | 1.99 | Mm.12481  |
| 873820 | tight junction protein 1                                       | 2.00 | Mm.4342   |
| 395710 | kinectin 1                                                     | 2.00 | Mm.3110   |
| 918258 |                                                                | 2.00 |           |
| 915280 | nucleolar protein 1                                            | 2.01 | Mm.29203  |
| 895336 |                                                                | 2.01 | Mm.290899 |
| 922648 | nuclear distribution gene C homolog (Aspergillus)              | 2.01 | Mm.69     |
| 430195 | RIKEN cDNA 2900042B11 gene                                     | 2.02 |           |
| 894725 |                                                                | 2.02 |           |
| 391089 | syntaxin 16                                                    | 2.02 | Mm.277977 |
| 386559 | transforming acidic coiled-coil containing protein 2           | 2.02 | Mm.86322  |
| 865981 | retinol dehydrogenase 14 (all-trans and 9-cis)                 | 2.03 | Mm.119343 |
| 866620 | transforming growth factor beta regulated gene 1               | 2.03 | Mm.28689  |
| 378126 | RIKEN cDNA 1810031K02 gene                                     | 2.03 | Mm.271819 |
| 895670 |                                                                | 2.03 |           |
| 726089 | formin-like 2                                                  | 2.03 |           |
| 572959 | complexin 1                                                    | 2.04 | Mm.5195   |
| 916529 | Yip1 interacting factor homolog (S. cerevisiae)                | 2.04 | Mm.44202  |
| 706669 | RIKEN cDNA 1500032D16 gene                                     | 2.04 | Mm.28349  |
| 909343 | CREBBP/EP300 inhibitory protein 1                              | 2.04 | Mm.44244  |
| 390250 | similar to GTP-binding protein ragB                            | 2.04 | Mm.190922 |
| 918576 | Down syndrome critical region gene 3                           | 2.05 | Mm.7472   |
| 673760 | SLIT and NTRK-like family member 1                             | 2.05 | Mm.257268 |
| 445412 | cDNA sequence BC039282                                         | 2.05 |           |
| 848125 |                                                                | 2.05 |           |
| 699614 | RIKEN cDNA C630016O21 gene                                     | 2.06 |           |
| 794941 | hypothetical LOC433214                                         | 2.06 |           |
| 896578 | katanin p60 (ATPase-containing) subunit A1                     | 2.07 | Mm.28127  |
| 746867 | translocase of outer mitochondrial membrane 40 homolog (yeast) | 2.07 | Mm.333649 |
| 456746 | similar to hypothetical protein MGC35048                       | 2.07 |           |
| 371604 | serine/arginine repetitive matrix 1                            | 2.07 | Mm.1963   |
| 740967 | general transcription factor II I repeat domain-containing 1   | 2.07 | Mm.332735 |



|        |                                                                                                         |      |           |
|--------|---------------------------------------------------------------------------------------------------------|------|-----------|
| 464702 | RIKEN cDNA B230333C21 gene                                                                              | 2.07 |           |
| 779391 | coagulation factor IX                                                                                   | 2.08 |           |
| 476191 | sirtuin 4 (silent mating type information regulation 2 homolog) 4 (S. cerevisiae)                       | 2.08 |           |
| 336538 | glycosyltransferase 25 domain containing 1                                                              | 2.08 | Mm.358838 |
| 752144 | RIKEN cDNA 2900009I07 gene                                                                              | 2.08 | Mm.195675 |
| 551066 | nitrilase family member 2                                                                               | 2.09 | Mm.213292 |
| 918939 | NADH dehydrogenase (ubiquinone) 1 beta subcomplex 5                                                     | 2.09 | Mm.28058  |
| 329691 |                                                                                                         | 2.09 |           |
| 923456 | CCR4-NOT transcription complex subunit 6                                                                | 2.09 | Mm.247113 |
| 505383 | RIKEN cDNA 2610036F08 gene                                                                              | 2.10 |           |
| 831793 | RIKEN cDNA B630019K06 gene                                                                              | 2.10 | Mm.41588  |
| 417771 | RIKEN cDNA 9130422G05 gene                                                                              | 2.10 | Mm.252239 |
| 712683 |                                                                                                         | 2.11 |           |
| 335383 |                                                                                                         | 2.11 |           |
| 732230 | calcium channel voltage-dependent N type alpha 1B subunit                                               | 2.11 | Mm.4424   |
| 912820 | actin gamma 2 smooth muscle enteric                                                                     | 2.11 | Mm.292865 |
| 312249 | acyl-Coenzyme A oxidase 1 palmitoyl                                                                     | 2.12 | Mm.356689 |
| 853542 | zinc finger CCHC domain containing 3                                                                    | 2.12 | Mm.18589  |
| 621410 | exosome component 8                                                                                     | 2.12 | Mm.29253  |
| 897733 |                                                                                                         | 2.13 |           |
| 743936 | dickkopf homolog 3 (Xenopus laevis)                                                                     | 2.13 | Mm.55143  |
| 897021 |                                                                                                         | 2.13 |           |
| 630663 |                                                                                                         | 2.13 |           |
| 931052 | X-box binding protein 1                                                                                 | 2.14 | Mm.22718  |
| 856498 | dihydrolipoamide S-acetyltransferase (E2 component of pyruvate dehydrogenase complex)                   | 2.14 | Mm.285076 |
| 879998 | splicing factor 3b subunit 3                                                                            | 2.14 | Mm.236123 |
| 894506 |                                                                                                         | 2.15 |           |
| 817827 | endothelial differentiation sphingolipid G-protein-coupled receptor 8                                   | 2.15 | Mm.190619 |
| 536382 | RIKEN cDNA 5830457H20 gene                                                                              | 2.15 | Mm.311904 |
| 900377 | RIKEN cDNA 1110049G11 gene                                                                              | 2.15 | Mm.21705  |
| 339246 | RIKEN cDNA 2900075B16 gene                                                                              | 2.15 |           |
| 693416 | lysosomal membrane glycoprotein 2                                                                       | 2.15 | Mm.486    |
| 553399 | manic fringe homolog (Drosophila)                                                                       | 2.15 | Mm.149235 |
| 678170 | similar to Nucleolar phosphoprotein p130 (Nucleolar 130 kDa protein) (140 kDa nucleolar phosphoprotein) | 2.16 | Mm.23126  |

|        |                                                                          |      |                     |
|--------|--------------------------------------------------------------------------|------|---------------------|
|        | (Nopp140) (Nucleolar and coiled-body phosphoprotein 1)                   |      |                     |
| 896881 | zinc finger protein 352                                                  | 2.16 | Mm.214642           |
| 712492 | NAD(P)H dehydrogenase quinone 1                                          | 2.17 | Mm.252              |
| 338173 | RIKEN cDNA 1300004G08 gene                                               | 2.18 | Mm.267353           |
| 333472 |                                                                          | 2.18 | Mm.269613;Mm.328835 |
| 629403 | dystrobrevin alpha                                                       | 2.18 | Mm.94371            |
| 910025 | polyglutamine binding protein 1                                          | 2.18 | Mm.14616            |
| 339107 | Kruppel-like factor 9                                                    | 2.19 | Mm.291595           |
| 884236 | glycogenin 1                                                             | 2.19 | Mm.6375             |
| 714975 |                                                                          | 2.19 |                     |
| 901911 |                                                                          | 2.19 |                     |
| 520170 | ubiquitin-conjugating enzyme E2 J1                                       | 2.19 | Mm.259095           |
| 696213 | TPA regulated locus                                                      | 2.19 | Mm.790              |
| 419819 | G protein-coupled receptor family C group 5 member B                     | 2.19 | Mm.103439           |
| 335521 | RIKEN cDNA 2610014H22 gene                                               | 2.19 |                     |
| 585468 | DNA segment Chr 3 ERATO Doi 194 expressed                                | 2.20 | Mm.366053           |
| 738829 | tyrosine hydroxylase                                                     | 2.20 | Mm.1292             |
| 421011 | RIKEN cDNA 2610101J03 gene                                               | 2.20 |                     |
| 877236 | dolichyl pyrophosphate phosphatase 1                                     | 2.20 | Mm.285167           |
| 655012 |                                                                          | 2.21 |                     |
| 894728 |                                                                          | 2.21 |                     |
| 889344 | phosphatidic acid phosphatase 2a                                         | 2.22 | Mm.317186           |
| 930816 | ELAV (embryonic lethal abnormal vision Drosophila)-like 2 (Hu antigen B) | 2.22 | Mm.318042           |
| 613060 | cyclin C                                                                 | 2.22 | Mm.278584           |
| 904678 |                                                                          | 2.22 |                     |
| 768967 | RIKEN cDNA 2810417M05 gene                                               | 2.22 | Mm.357108           |
| 921400 |                                                                          | 2.23 |                     |
| 462585 |                                                                          | 2.24 |                     |
| 376674 | RIKEN cDNA 4921524J17 gene                                               | 2.24 | Mm.272748           |
| 606366 | UDP-Gal:betaGal beta 1 3-galactosyltransferase polypeptide 6             | 2.24 | Mm.347395           |
| 724999 | arachidonate lipoxygenase 3                                              | 2.24 | Mm.41989            |
| 437017 | zinc finger protein 330                                                  | 2.24 | Mm.269248           |
| 875960 | expressed sequence AI414054                                              | 2.25 |                     |
| 753113 |                                                                          | 2.25 |                     |
| 685791 |                                                                          | 2.25 |                     |
| 874504 | similar to Sm protein F                                                  | 2.25 |                     |
| 401103 | regulator of G-protein signaling 5                                       | 2.25 | Mm.20954            |

|        |                                                                                                             |      |           |
|--------|-------------------------------------------------------------------------------------------------------------|------|-----------|
| 307231 | signal recognition particle 68                                                                              | 2.25 | Mm.29655  |
| 927680 | G protein-coupled receptor 37                                                                               | 2.25 | Mm.20465  |
| 437292 | MAD homolog 7 (Drosophila)                                                                                  | 2.25 | Mm.34407  |
| 507892 |                                                                                                             | 2.26 | Mm.27330  |
| 734811 | guanosine diphosphate (GDP) dissociation inhibitor 1                                                        | 2.27 | Mm.205830 |
| 879933 | BCL2/adenovirus E1B 19kDa-interacting protein 3-like                                                        | 2.27 | Mm.29820  |
| 444995 | copine VIII                                                                                                 | 2.27 | Mm.290991 |
| 730737 |                                                                                                             | 2.28 |           |
| 513928 | RIKEN cDNA 6330530A05 gene                                                                                  | 2.28 | Mm.23639  |
| 529136 | scrapie responsive gene 1                                                                                   | 2.28 | Mm.12886  |
| 542100 |                                                                                                             | 2.28 |           |
| 322037 | B-cell receptor-associated protein 31                                                                       | 2.29 | Mm.17     |
| 497026 | tight junction protein 2                                                                                    | 2.29 | Mm.104744 |
| 895303 | NADH dehydrogenase (ubiquinone) 1 alpha/beta subcomplex 1                                                   | 2.30 | Mm.347976 |
| 434412 | exosome component 1                                                                                         | 2.30 | Mm.289086 |
| 413315 | cDNA sequence BC060632                                                                                      | 2.31 | Mm.334807 |
| 773785 |                                                                                                             | 2.31 |           |
| 501359 |                                                                                                             | 2.31 |           |
| 433605 | LEM domain containing 2                                                                                     | 2.32 | Mm.29689  |
| 517989 |                                                                                                             | 2.32 |           |
| 662321 | RIKEN cDNA 1110033C18 gene                                                                                  | 2.33 | Mm.294975 |
| 674893 | RIKEN cDNA 3110050N22 gene                                                                                  | 2.33 | Mm.332366 |
| 911444 | dolichyl-phosphate (UDP-N-acetylglucosamine) acetylglucosaminophosphotransferase 1 (GlcNAc-1-P transferase) | 2.33 | Mm.18353  |
| 334630 |                                                                                                             | 2.34 | Mm.143877 |
| 816466 |                                                                                                             | 2.34 | Mm.145535 |
| 604413 |                                                                                                             | 2.34 |           |
| 517181 | mannoside acetylglucosaminyltransferase 3                                                                   | 2.35 | Mm.299693 |
| 365705 |                                                                                                             | 2.35 |           |
| 496759 | cDNA sequence BC037708                                                                                      | 2.37 | Mm.34034  |
| 457238 |                                                                                                             | 2.37 |           |
| 742562 |                                                                                                             | 2.38 |           |
| 924677 | leukocyte receptor cluster (LRC) member 5                                                                   | 2.38 | Mm.287981 |
| 545193 | syntaxin 7                                                                                                  | 2.38 | Mm.248042 |
| 915482 | THUMP domain containing 3                                                                                   | 2.38 | Mm.781    |
| 894455 |                                                                                                             | 2.39 | Mm.341848 |
| 646976 | hypocretin                                                                                                  | 2.40 | Mm.10096  |
| 900361 |                                                                                                             | 2.41 |           |

|        |                                                                                 |      |           |
|--------|---------------------------------------------------------------------------------|------|-----------|
| 659722 |                                                                                 | 2.41 |           |
| 435967 | RIKEN cDNA 1500031M22 gene                                                      | 2.41 | Mm.235934 |
| 828947 |                                                                                 | 2.41 |           |
| 643007 |                                                                                 | 2.41 |           |
| 470064 |                                                                                 | 2.42 |           |
| 638154 | microtubule associated<br>monooxygenase calponin and LIM<br>domain containing 1 | 2.42 | Mm.290431 |
| 873062 | glutamate receptor metabotropic 3                                               | 2.43 | Mm.318966 |
| 519800 | adrenergic receptor beta 1                                                      | 2.43 | Mm.46797  |
| 839890 | ectonucleotide<br>pyrophosphatase/phosphodiesterase<br>4                        | 2.43 | Mm.359258 |
| 835249 | vacuolar protein sorting 52 (yeast)                                             | 2.44 |           |
| 670264 | RIKEN cDNA 6330406P08 gene                                                      | 2.44 | Mm.211850 |
| 691898 | protein phosphatase 1 regulatory<br>(inhibitor) subunit 8                       | 2.44 | Mm.105230 |
| 575079 | RIKEN cDNA A630029G22 gene                                                      | 2.44 |           |
| 568678 | slingshot homolog 2 (Drosophila)                                                | 2.46 | Mm.1843   |
| 698270 | cleavage stimulation factor 3' pre-<br>RNA subunit 2                            | 2.46 | Mm.67938  |
| 809904 |                                                                                 | 2.46 |           |
| 485013 | nurim (nuclear envelope membrane<br>protein)                                    | 2.48 | Mm.279713 |
| 621280 | cDNA sequence BC055368                                                          | 2.48 | Mm.46778  |
| 828382 | dynammin 1-like                                                                 | 2.48 | Mm.218820 |
| 382399 | armadillo repeat containing 8                                                   | 2.49 | Mm.234823 |
| 598365 | similar to hypothetical protein<br>6720451E15                                   | 2.50 |           |
| 442601 | transformation related protein 53<br>binding protein 2                          | 2.51 | Mm.287450 |
| 478797 | NK6 transcription factor related locus<br>2 (Drosophila)                        | 2.52 | Mm.28308  |
| 931803 |                                                                                 | 2.52 |           |
| 329871 |                                                                                 | 2.52 |           |
| 356297 | zinc finger FYVE domain containing<br>19                                        | 2.53 | Mm.28335  |
| 904646 | small nuclear ribonucleoprotein D1                                              | 2.55 | Mm.603    |
| 693573 | tubulin tyrosine ligase-like 1                                                  | 2.56 | Mm.235007 |
| 305278 |                                                                                 | 2.56 |           |
| 555213 |                                                                                 | 2.56 |           |
| 720488 | RIKEN cDNA 5730461K03 gene                                                      | 2.57 | Mm.35105  |
| 899397 |                                                                                 | 2.57 |           |
| 834548 | aristaless related homeobox gene<br>(Drosophila)                                | 2.58 | Mm.275547 |
| 850424 | similar to Chromosome 6 open<br>reading frame 117                               | 2.58 |           |

|        |                                                                           |      |                   |
|--------|---------------------------------------------------------------------------|------|-------------------|
| 312031 | ankyrin repeat domain 35                                                  | 2.60 |                   |
| 897193 |                                                                           | 2.62 | Mm.4863;Mm.371619 |
| 406804 | caseinolytic protease ATP-dependent proteolytic subunit homolog (E. coli) | 2.63 | Mm.287892         |
| 613167 | carboxypeptidase E                                                        | 2.65 | Mm.31395          |
| 908796 | myeloid ecotropic viral integration site-related gene 1                   | 2.67 | Mm.247566         |
| 775649 | paired-like homeodomain transcription factor 3                            | 2.68 | Mm.6255           |
| 786647 |                                                                           | 2.69 |                   |
| 438579 | arylacetamide deacetylase-like 1                                          | 2.69 | Mm.24576          |
| 728106 | DNA segment Chr 11 ERATO Doi 497 expressed                                | 2.71 | Mm.289456         |
| 727964 |                                                                           | 2.72 |                   |
| 899362 |                                                                           | 2.74 | Mm.180458         |
| 852433 | ribophorin II                                                             | 2.75 | Mm.360059         |
| 308822 | RIKEN cDNA 1700106N22 gene                                                | 2.76 |                   |
| 777644 | radial spokehead-like 3                                                   | 2.76 |                   |
| 928491 | peroxisome biogenesis factor 19                                           | 2.78 | Mm.247764         |
| 678212 | neurotensin                                                               | 2.78 | Mm.64201          |
| 370098 |                                                                           | 2.79 |                   |
| 643313 |                                                                           | 2.80 |                   |
| 862810 | fructosamine 3 kinase                                                     | 2.84 | Mm.266448         |
| 474370 | ErbB2 interacting protein                                                 | 2.84 | Mm.277354         |
| 761287 | inositol polyphosphate-1-phosphatase                                      | 2.88 | Mm.917            |
| 370857 | ectonucleotide pyrophosphatase/phosphodiesterase 5                        | 2.89 | Mm.30145          |
| 929317 | villin 2                                                                  | 2.90 | Mm.277812         |
| 703539 | carbonic anhydrase 3                                                      | 2.93 | Mm.300            |
| 637150 | isocitrate dehydrogenase 1 (NADP+) soluble                                | 2.95 | Mm.9925           |
| 309126 | RIKEN cDNA 1500034E06 gene                                                | 2.98 | Mm.45683          |
| 593436 | zinc finger SWIM domain containing 1                                      | 2.99 | Mm.161149         |
| 929928 | RIKEN cDNA 3110007P09 gene                                                | 2.99 | Mm.238094         |
| 394580 | RIKEN cDNA 3300001G02 gene                                                | 3.02 | Mm.29952          |
| 470415 | glyceraldehyde-3-phosphate dehydrogenase spermatogenic                    | 3.10 | Mm.1729           |
| 718611 |                                                                           | 3.10 |                   |
| 900064 |                                                                           | 3.13 |                   |
| 671047 | cDNA sequence BC014795                                                    | 3.19 | Mm.185518         |
| 392344 |                                                                           | 3.20 |                   |
| 898384 |                                                                           | 3.30 |                   |
| 731884 |                                                                           | 3.31 |                   |
| 444475 |                                                                           | 3.39 |                   |

|        |                                                                                         |       |           |
|--------|-----------------------------------------------------------------------------------------|-------|-----------|
| 922287 | RIKEN cDNA C030004A17 gene                                                              | 3.46  | Mm.24197  |
| 324166 |                                                                                         | 3.47  |           |
| 329527 |                                                                                         | 3.51  |           |
| 346965 | expressed sequence AA415817                                                             | 3.62  | Mm.171484 |
| 423599 | tetraspan 2                                                                             | 3.62  | Mm.27469  |
| 562314 | expressed sequence BM948371                                                             | 3.76  |           |
| 811338 | RAB5A member RAS oncogene family                                                        | 3.89  | Mm.329123 |
| 428401 | aggrecan 1                                                                              | 3.90  | Mm.358571 |
| 846124 | guanine nucleotide binding protein (G protein) gamma transducing activity polypeptide 2 | 3.93  | Mm.46299  |
| 366579 |                                                                                         | 4.41  |           |
| 737367 | actinin alpha 2                                                                         | 4.42  | Mm.37638  |
| 732899 | 2'-5' oligoadenylate synthetase-like 2                                                  | 4.51  | Mm.228363 |
| 866377 | rabphilin 3A                                                                            | 4.72  | Mm.181166 |
| 653008 | ribonuclease T2                                                                         | 4.73  | Mm.235715 |
| 926484 | citron                                                                                  | 4.81  | Mm.8321   |
| 761588 | TAF11 RNA polymerase II TATA box binding protein (TBP)-associated factor                | 5.17  | Mm.267998 |
| 783961 | similar to eukaryotic translation initiation factor 3 subunit 12                        | 5.44  |           |
| 731966 |                                                                                         | 15.46 |           |
| 931646 | RAB GTPase activating protein 1-like                                                    | 26.57 | Mm.25833  |
